1           **Astral microtubule crosslinking by Feo safeguards uniform nuclear distribution**  
2                                           **in the *Drosophila* syncytium**

3  
4           Ojas Deshpande<sup>\*</sup>, Jorge de-Carvalho<sup>\*,#</sup>, Diana V. Vieira<sup>\*,#</sup> and Ivo A. Telley<sup>\*.§</sup>

5  
6   <sup>\*</sup> Instituto Gulbenkian de Ciência, Fundação Calouste Gulbenkian, Oeiras, Portugal

7   <sup>#</sup> Co-authors in alphabetical order

8   <sup>§</sup> Lead contact

9   Correspondence to: [itelley@igc.gulbenkian.pt](mailto:itelley@igc.gulbenkian.pt)

10  
11   Keywords: PRC1, Kif4, coenocyte, central spindle, microtubule interaction, nuclear positioning

12  
13   **Abstract:**

14   The early insect embryo develops as multinucleated cell distributing genomes uniformly to the cell  
15   cortex. Mechanistic insight for nuclear positioning beyond cytoskeletal requirements is missing to  
16   date. Contemporary hypotheses propose actomyosin driven cytoplasmic movement transporting  
17   nuclei, or repulsion of neighbor nuclei driven by microtubule motors. Here, we show that  
18   microtubule crosslinking by Feo and Klp3A is essential for nuclear distribution and internuclear  
19   distance maintenance in *Drosophila*. RNAi knockdown in the germline causes irregular, less dense  
20   nuclear delivery to the embryo cortex and smaller distribution in *ex vivo* embryo explants. A  
21   minimal internuclear distance is maintained in explants from control embryos but not from Feo  
22   depleted embryos, following micromanipulation assisted repositioning. A dominant-negative Feo  
23   protein abolishes nuclear separation in embryo explants while the full-length protein rescues the  
24   genetic knockdown. We conclude that antiparallel microtubule overlap crosslinking by Feo and  
25   Klp3A generates a length-regulated mechanical link between neighboring microtubule asters.  
26   Enabled by a novel experimental approach, our study illuminates an essential process of embryonic  
27   multicellularity.

## 29 Introduction

30 The nucleus relocates within the cell boundary in response to cell function<sup>1,2</sup>. Aberrant nuclear  
31 positioning has been linked to failure of fundamental processes such as early embryo development,  
32 cell differentiation, cell migration, polarity determination and homeostasis<sup>3-8</sup>. Nuclear positioning  
33 depends on a set of nuclear envelope proteins linking the cytoskeletal network and transmitting  
34 active force generation to the nucleus for movement<sup>1,9</sup>. In mononuclear cells, cytoskeletal elements  
35 mechanically connect the nucleus to the cell cortex being the reference system for positioning<sup>10,11</sup>.  
36 One exception are large eggs in which cytoskeletal links between the nucleus and the distant cell  
37 cortex are not achieved<sup>12</sup>. Conversely, a multinucleated cell – coenocyte – undergoing nuclear  
38 proliferation has to generate positional information with each additional nucleus and requires a  
39 mechanism that adjusts the distance between neighboring nuclei<sup>13</sup>. The early embryo of *Drosophila*  
40 *melanogaster* is both large and multinucleated but exhibits a surprising positional regularity of  
41 hundreds of nuclei perturbed by rounds of meta-synchronous nuclear divisions<sup>14</sup>. During the first  
42 seven rounds, the nuclei spread axially from the anterior to the posterior end of the embryo and  
43 occupy the entire cell volume<sup>15</sup>. During nuclear cycles 7–9, most nuclei migrate to the embryo  
44 cortex, where they undergo additional rounds of division as they are anchored and prepared for  
45 cellularization<sup>16</sup>. Adequate number of nuclei and their proper positioning at the cortex determines  
46 cell size<sup>17</sup>, is essential for epithelia formation and subsequent development<sup>18,19</sup> and is a result of  
47 regular distribution of ancestor nuclei during the preceding developmental phase<sup>20-22</sup>. The  
48 mechanisms required for maintaining the internuclear distances uniformly are not understood.  
49 Drug inhibition and mutagenesis suggest that actomyosin mediated cortical contractions drive  
50 cytoplasmic streaming and transport the nuclei predominantly along the longer axis of the  
51 embryo<sup>17,23-27</sup>. However, large-scale transport of cytoplasm does neither explain how a uniform  
52 distribution emerges nor how nuclei are kept separate. Conversely, astral microtubules are required  
53 for nuclear movement<sup>28</sup>, and embryos with abnormal microtubule aster morphology exhibit nuclear  
54 collision or spindle fusion<sup>20-22</sup>. Baker et al.<sup>15</sup> proposed a repulsion mechanism by motor binding  
55 and sliding antiparallel overlaps of astral microtubules from neighboring nuclei, which is  
56 reminiscent of the spindle midzone model explaining spindle elongation during anaphase B<sup>29,30</sup>. At  
57 the core lies Klp61F, a homotetrameric, bipolar Kinesin-5 which binds two overlapping  
58 microtubules and, when microtubules are antiparallel, slides them outwards reducing microtubule  
59 overlap length<sup>31-33</sup>. Fascetto (Feo) is the *Drosophila* homolog of the Ase1p/PRC1/MAP65 family  
60 of homodimeric, non-motor microtubule-associated proteins (MAPs) which preferentially binds  
61 antiparallel microtubule overlaps<sup>34-36</sup>. It accumulates at the spindle midzone from anaphase to  
62 telophase upon cyclin B degradation and controls the binding affinity of molecular motors in the

63 spindle midzone<sup>29,37-40</sup>. One of these motors is Klp3A, a Kinesin-4 homolog, a microtubule  
64 depolymerase with chromatin binding affinity<sup>35,41-44</sup>. PRC1 and Kinesin-4 are sufficient to form a  
65 stable microtubule overlap *in vitro*<sup>35</sup>. Kinesin-5 is able to reduce overlapping, antiparallel  
66 microtubules crosslinked by PRC1 *in vitro*<sup>36</sup>, which was proposed to contribute to force balance in  
67 the spindle midzone during anaphase B<sup>30</sup>. Here, we investigated whether these three proteins are  
68 required for nuclear separation, lending support to an aster-aster interaction model<sup>15,45</sup>. We  
69 performed a combination of gene knockdown, micromanipulation and perturbation by exogenous  
70 protein addition in embryo explants which enable time-lapse visualization of nuclear and  
71 cytoskeletal dynamics previously unachieved.

## 72 **Results**

### 73 *Feo localization confirm antiparallel microtubule overlaps between asters of non-sister nuclei*

74 Molecular crosslinking between astral microtubules of neighboring nuclei during the  
75 preblastoderm embryo stage has been largely unexplored due to optical constraints in live imaging.  
76 Using an extraction method to generate cytoplasmic explants from individual preblastoderm  
77 embryos<sup>46</sup> expressing Klp61F::GFP and Feo::mCherry, and injected with Alexa647-labeled  
78 Tubulin (Fig. 1a), we visualized the localization of Klp61F and Feo to infer about their binding to  
79 spindle microtubules (Fig. 1b). Klp61F::GFP localized at the microtubule-organizing centers  
80 (MTOC), the metaphase spindle and the spindle midzone in anaphase, as described previously for  
81 the nuclear divisions at the blastoderm stage<sup>31,33,47-49</sup> (Suppl. Video 1). Furthermore, during  
82 anaphase B and telophase we observed Klp61F::GFP decorated microtubules intercalating with  
83 those from the neighboring aster, raising the possibility of antiparallel alignment of these astral  
84 microtubules, forming an overlap zone to which Kinesin-5 binds. On the other hand, Feo::mCherry  
85 exhibited weak localization to the metaphase spindle but strong localization to the spindle midzone  
86 during anaphase B and telophase (Fig. 1b, arrows), as previously described for blastoderm division  
87 cycles<sup>38</sup>. Strikingly, Feo also localized in small foci to the region between the nuclei (Fig. 1b,c,  
88 arrowheads), thus reporting the presence of antiparallel microtubule overlaps which Feo binds to  
89 with higher affinity than individual microtubules. *In vitro*, microtubule overlaps that are decorated  
90 by Feo homologs are length controlled through the polymerase activity of Kinesin-4<sup>35</sup>. Thus, the  
91 signal of Feo along microtubule overlaps should have a consistent length for a given concentration  
92 or activity of Feo and Klp3A. Thus, we measured the length of Feo::GFP signal foci during  
93 anaphase B (Fig. 1d). Because individual microtubules were not resolved, we measured the  
94 orientation of the signal foci in the context of where microtubules are growing and radially  
95 emanating from, the MTOCs at the spindle pole. In anaphase and telophase, the four nuclei

96 emerging from any two neighboring spindles define four MTOCs and, thus, four possible  
97 combinations of astral microtubules interacting (Fig. 1c, right). We measured the angle  $\theta$  between  
98 the long axes of the signal foci and the closest connecting line between two MTOCs (Fig. 1e). This  
99 angle deviated little from zero, supporting the notion that Feo reports microtubule overlaps along  
100 the shortest path between neighboring asters. Altogether, in extract from preblastoderm embryos,  
101 the relative position of nuclei and the length of astral microtubules leads to the formation of short  
102 antiparallel microtubule overlaps which Feo binds to. Furthermore, as a consequence of Feo  
103 crosslinking astral microtubules, a mechanical connection is established that may be controlling  
104 the distance between neighboring asters and their associated nuclei.

105 During the last four syncytial nuclear cycles at the cortex, the current understanding of nuclear  
106 separation is thought to be embodied by the actin based pseudo-compartment driving membrane  
107 invagination, a physical barrier that is assembled and disassembled in every division cycle<sup>50,51</sup>.  
108 Surprisingly, time-lapse confocal imaging of living embryos expressing either Klp61F::GFP and  
109 Feo::mCherry (Fig. 1f, Suppl. Video 2) or Klp3A::GFP and Feo::mCherry (Fig. 1g, Suppl. Video  
110 3), after injection of Alexa647-Tubulin, revealed strong localization at the spindle midzone  
111 (arrows) and spot-like signals between neighboring spindles (arrowheads) of Feo colocalizing with  
112 Klp3A in anaphase and telophase. On one hand, this observation confirms the combined and  
113 colocalized activity of Feo and Klp3A, whereby Feo binding to microtubule overlaps recruits  
114 Klp3A to the overlap by increasing the binding affinity<sup>35,44</sup>. On the other hand, and more  
115 surprisingly, the signal foci indicate the occurrence of antiparallel microtubule overlaps between  
116 neighboring non-sister nuclei across actin furrows and membrane invaginations. This observation  
117 led us to question the current paradigm that actin pseudo-compartments prevent microtubule  
118 crosslinking between neighboring asters or nuclei. We hypothesize from this localization data that  
119 the microtubule-based mechanical connection plays a decisive role in nuclear positioning in  
120 preblastoderm and early blastoderm stage embryos.

### 121 ***Partial knockdown of Feo, Klp3A or Klp61F leads to defective nuclear delivery to the embryo*** 122 ***cortex***

123 We wanted to understand the functional implication of the three microtubule binding proteins  
124 localizing between non-sister nuclei, and if the function is related to correct nuclear delivery to the  
125 embryo cortex. To this end, we perturbed the protein levels of Feo, Klp3A or Klp61F using an  
126 RNA interference approach and UAS-Gal4 expression in the germline<sup>52</sup>. We expressed RNAi  
127 against these genes individually in the developing *Drosophila* oocyte (Suppl. Fig. 1), while  
128 expressing Jupiter::GFP, a microtubule reporter<sup>53</sup>, and H2Av::RFP, a chromatin reporter<sup>54</sup>. We

129 exploited the expression kinetics of V32–Gal4 to drive the UASp–RNAi constructs with peak in  
130 late oogenesis to prevent undesirable defects during stem cell differentiation. Fertilization in  
131 embryos depleted of Feo, Klp3A or Klp61F was similar to the control embryos (data not shown).  
132 However, we were unable to determine the exact cycle number when nuclei arrived at the cortex  
133 in knockdown embryos. Of note, the interval of division cycles occurring at the cortex and in the  
134 cytoplasmic explants remained unaltered when compared to controls. Under all knockdown  
135 conditions, we observed nuclei arriving later on average; ~45 min in knockdown condition versus  
136 ~15 min in controls, following a 45 min egg laying period. In knockdown embryos, nuclei were  
137 irregularly distributed at the cortex and sometimes missing entirely at the posterior end, in contrast  
138 to the regular distribution seen in the control RNAi embryo (Fig. 2a, Suppl. Fig. 2). The nuclear  
139 density is reduced in the knockdowns as compared to the control (Fig. 2b) but exhibits considerable  
140 variability between embryos, which we attributed to the incomplete RNAi. Our analysis revealed  
141 embryos with larger areas lacking nuclei (Suppl. Fig. 3a), with anatomically eccentric (Suppl. Fig.  
142 3b) and asymmetric nuclear distribution (Suppl. Fig. 3c). Overall, RNAi against Feo resulted in  
143 larger distribution changes than RNAi against Klp61F despite similar average internuclear distance  
144 (Fig. 2b,c, Suppl. Fig. 3). The internuclear distance distribution is shifted towards longer distances  
145 and is more right-tailed for knockdown conditions, while RNAi against Klp3A gave on average  
146 the strongest phenotype (Fig. 2c, Suppl. Fig. 3d). We also observed a considerable reduction of  
147 fluorescence intensity of Klp3A::GFP at the midzone in Feo knockdown embryos (Suppl. Fig. 4).  
148 This confirms Klp3A being downstream of Feo binding to microtubule overlaps<sup>35</sup> and indicates  
149 that a reduction of Feo protein concentration by half has a disproportionately stronger effect on  
150 Klp3A localization at microtubule overlaps. The irregularity in nuclear position at the cortex  
151 increased as the nuclear cycles progressed (Suppl. Video 4). We, sometimes, observed fusion of  
152 sister nuclei after mitosis. More interestingly, we also recorded non-sister nuclear movement  
153 towards each other in Feo knockdown embryos, leading to fusion of the spindles and over-  
154 condensed chromatin. Conversely, fusion was never seen in controls. In summary, the activity of  
155 all three microtubule associated proteins is required in the preblastoderm embryo for correct  
156 delivery of nuclei to the embryo cortex. However, Kinesin-5 is required for spindle assembly<sup>49,55</sup>  
157 and, thus, the phenotype could emerge due to assembly defects rather than post-mitotic nuclear  
158 separation. Because depletion of Kinesin-5 led to a mild phenotype despite high knockdown  
159 efficiency (Suppl. Fig. 3a), and because of the functional relationship between Feo and Klp3A, we  
160 followed up on the role of the latter two genes in internuclear distance maintenance.

161

162 ***Developmental reset ex vivo reveals failure in nuclear distribution upon RNAi knockdown***

163 Our analysis of nuclear distribution during partial knockdown in the embryo suggests that Feo and  
164 Klp3A are involved in nuclear delivery to the cortex. However, our protein knockdown approach  
165 *in vivo* has two drawbacks that could potentially lead to misinterpretation: (i) the three proteins  
166 play a role in spindle midzone function, and their depletion may affect chromosome segregation in  
167 anaphase; (ii) The RNAi expression occurs chronically during late oogenesis. Thus, the irregular  
168 distribution of nuclei during cortical migration could be due to early sister chromatid separation  
169 errors, leading to missing nuclei in the embryo center and exponentially fewer in subsequent  
170 division cycles. Alternatively, inefficient nuclear separation following fertilization could lead to  
171 spindle fusion and mitotic errors. To circumvent the inability to detect accumulated effects, we  
172 performed time-lapse imaging of nuclear division cycles in cytoplasmic explants from  
173 preblastoderm embryos that were depleted of either Feo or Klp3A. Because these explants  
174 contained only few dividing nuclei, we could follow their distribution, or the failure thereof, while  
175 mimicking the very beginning of preblastoderm embryo development. We followed individual  
176 nuclei undergoing division cycles and registered the distribution and any fusion events between  
177 sister and non-sister nuclei (Fig. 3a). In explants from control embryos, nuclei divide and distribute  
178 regularly in the entire explant (Fig. 3a, left, white dashed circle) until a saturated nuclear  
179 distribution is reached and mitotic failures in the subsequent cycle are common. The nuclear  
180 density at saturation is comparable to nuclear cycle 10 in the intact embryo (1800–2000  
181 nuclei/mm<sup>2</sup>)<sup>14</sup>, corresponding to an internuclear distance of ~25 μm (hexagonal approximation).  
182 Strikingly, the nuclei from Feo and Klp3A knockdown embryos also divide consecutively. The  
183 average distance between sister nuclei and between non-sister nuclei was lower in the test RNAi  
184 as compared to the control (Fig. 3b,c). However, the nuclear position after mitotic separation was  
185 maintained in the Feo RNAi while knockdown of Klp3A led to frequent spindle fusion at a  
186 comparable nuclear density and accumulation of mitotic failure. Interestingly, spindle length  
187 decreased upon depletion of Feo (Fig. 3a), but we did not observe significant decrease in spindle  
188 length upon Klp3A depletion as reported earlier, most likely due to inefficient knockdown as  
189 compared to deletion<sup>56</sup>. In summary, the reduction of Feo protein expression leads to reduced  
190 nuclear separation between sister nuclei and incomplete occupation of nuclei within the explant.  
191 However, while a reduction of Feo sustains mitotic divisions, Klp3A knockdown produces a  
192 spindle fusion phenotype. It is possible that the absence of Klp3A causes microtubule overlap over-  
193 growth and, despite crosslinking by Feo and other MAPs, these long overlaps are not mechanically  
194 stiff.

195 ***Displacement of nuclei is rescued in control but not in Feo RNAi embryo explants***

196 To test the model of an astral microtubule crosslinker-based separation mechanism for non-sister  
197 nuclei, we took advantage of the amenability of embryo explants for mechanical manipulation and  
198 designed an acute perturbation approach. We asked how Feo relocalizes when the distance between  
199 two interphase nuclei is manually reduced. Finally, we asked whether, under a Feo knockdown  
200 condition, nuclei could still adjust their position when brought in close proximity prior to division.  
201 To address these questions, we performed contact micromanipulation and changed the positions of  
202 two non-sister nuclei that were just exiting mitosis (Fig. 4a). As the manipulated nuclei continued  
203 mitotic progression we registered the localization of Feo::mCherry and measured the nuclear  
204 rearrangement during anaphase and telophase of the subsequent cycle. In agreement with our  
205 hypothesis, this physical perturbation caused strong localization of Feo::mCherry exclusively in  
206 the region between the manipulated nuclei while asters from distant nuclei, which were not  
207 manually displaced, did not recruit the microtubule crosslinker detectably (Fig. 4b). Next, we  
208 quantified nuclear separation of two neighboring nuclei dividing into four daughter nuclei by  
209 determining the four final positions (Fig. 4c), arranging these positions as a quadrilateral, aligning,  
210 annotating and overlaying them in a common coordinate system (Fig. 4d,e) and calculating area  
211 (Fig. 4f) and lateral distances (Fig. 4g,h). We performed these measurements under the control  
212 RNAi condition for nuclei in a large empty cytoplasmic space, in a saturated space where several  
213 nuclei have spread through the entire explant (see previous section), and in a crowded explant  
214 representing one more division cycle. We found that the area of nuclear separation after  
215 manipulation is lower than in the non-manipulated and saturated space but indifferent from the  
216 crowded control (Fig. 4f). The manipulated nuclei divided and separated their daughter nuclei at  
217  $\sim 15 \mu\text{m}$  while the distance between non-siblings was maintained at  $\sim 25 \mu\text{m}$ , phenocopying the  
218 minimal separation seen in crowded explants (Fig. 4g,h)<sup>28</sup>. Interestingly, these separation distances  
219 are similar to what was reported for the blastoderm embryo<sup>57</sup>. Finally, we performed the  
220 manipulation of nuclear position in Feo-depleted explants expressing Jupiter::GFP and  
221 H2Av::RFP. In these experiments, after manipulation, the daughter nuclei moved towards each  
222 other rather than apart (Suppl. Fig. 4c). The separation of siblings was approximately the nuclear  
223 diameter ( $\sim 7 \mu\text{m}$ ) (Fig. 4g, dashed line) and the separation of non-siblings was  $\sim 10 \mu\text{m}$  (Fig. 4h).  
224 We conclude that acute repositioning of nuclei is detected by the separation machinery, as reported  
225 by Feo, and counteracted to prevent spindle fusion or aggregation of nuclei. In other words, Feo is  
226 required to prevent nuclear collisions.

227

228 ***Nuclear separation in the syncytium requires astral microtubule crosslinking by Feo***

229 Feo is a dimer and, *in vitro*, has high affinity for binding two antiparallel microtubules<sup>35,36,44</sup>. In  
230 this function, Feo could be generating a repulsive mechanical link – an apparent stiffness – which  
231 prevents concentric movement and eventual contact of neighboring nuclei. This model predicts a  
232 lower repulsion stiffness in the presence of a monomeric construct of Feo, which binds to the same  
233 microtubule lattice binding site as the full-length dimer but does not crosslink the antiparallel  
234 microtubules. We expect that this dominant-negative effect can be measured as shorter internuclear  
235 distance, irregular separation or frequent nuclear contacts. Thus, we designed two protein  
236 expression constructs; one containing the full *feo* coding sequence (sFeoFL::GFP-His<sub>6</sub>), the other  
237 lacking the N-terminal dimerization domain (sFeoDN::GFP-His<sub>6</sub>), both fused with a C-terminal  
238 GFP and a His<sub>6</sub> tag sequence (Fig. 5a,c). Proteins were expressed in *E.coli*, affinity-purified and  
239 dialyzed into embryo extract compatible buffer<sup>58</sup> (Suppl. Fig. 5a). When these protein constructs  
240 were injected into preblastoderm embryos, the first nuclei to arrive at the embryo cortex showed  
241 strong GFP signals between dividing chromosomes where the central spindle is located (Fig. 5b,d,  
242 arrow). Both constructs were under cell cycle control as the fluorescence disappeared in interphase  
243 and reappeared during the next mitosis (Suppl. Video 5). Injection of full-length Feo maintained  
244 regular nuclear delivery to the embryo cortex while injection of dominant-negative Feo caused  
245 unnatural spindle contacts (Fig. 5d, arrowheads). As in transgenic embryos (Fig. 1f, arrowheads),  
246 we also detected small foci of green fluorescence between neighboring nuclei (Fig. 5b, arrowhead),  
247 suggesting that the purified protein and the transgenic construct localize identically. Furthermore,  
248 when the full-length protein was injected into Feo RNAi embryos the defective nuclear distribution  
249 was rescued to a large extent (Suppl. Fig. 5b). Nuclei arrive at the embryo cortex more  
250 symmetrically between anterior and posterior ends (Fig. 5e), in a less skewed distribution (Fig. 5f)  
251 and with more uniform internuclear distance (Fig. 5g) as compared to mock-injected Feo RNAi  
252 embryos. Owing to the variability of injection we could fully recover nuclear density to a normal  
253 level in two embryos and significantly increase nuclear density in the remaining five embryos (Fig.  
254 5h). Notably, the injected protein pool is stable for at least 90 minutes, throughout several division  
255 cycles. In summary, we show that a GFP-tagged full-length protein construct localizes correctly  
256 and rescues the gene knockdown in the germline. We conclude that it is functionally identical to  
257 the endogenous protein that is maternally deposited in the egg and stable during syncytial  
258 development.

259 Finally, having designed and purified the dominant-negative and the full-length protein with  
260 identical procedures, we asked how nuclear separation changes upon excess of dominant-negative



261 Feo protein, added at 100–200 nM final concentration to wildtype embryo explants containing one  
262 or two nuclei. As control condition, we injected the full-length protein at the same final  
263 concentration into embryo explants, and despite this perturbation the explant supported normal  
264 nuclear separation and distribution (Fig. 5i, left). Conversely, adding the monomeric  
265 sFeoDN::GFP-His<sub>6</sub> construct worsened nuclear separation considerably after chromosomes  
266 segregated. Here, in contrast to the control condition, nuclei did not occupy the entire explant space  
267 after consecutive divisions (Fig. 5i, right). The short internuclear distance led to unnatural  
268 chromosome aggregation, fusion and eventually to mitotic failure. Nuclear separation of two  
269 neighboring non-sister nuclei, as measured by the quadrilateral area defined by their position, was  
270 significantly smaller than in control divisions in the presence of full-length Feo protein (Fig. 5j,k).  
271 We conclude that microtubule crosslinking by Feo, in the presence of Klp3A, generates a repulsive  
272 mechanical link between microtubule asters. Thus, it lies at the heart of nuclear separation  
273 maintenance during the multinucleated 1-cell stage of *Drosophila* embryo development.

## 274 Discussion

275 A cornerstone of embryonic development is the formation of a polarized epithelium. Plants and  
276 many invertebrates achieve this developmental stage with a unicellular embryo undergoing nuclear  
277 proliferation followed by cellularization, a specialized form of cytokinesis<sup>16,59</sup>. Recently, the  
278 molecular building blocks and morphogenetic characteristics of cellularization have also been  
279 identified as part of the life cycle of a non-animal eukaryote<sup>60</sup>. The offspring of *Sphaeroforma*  
280 *arctica* arises from nuclear proliferation, compartmentalization, and plasma membrane  
281 invagination generating a proto-epithelium from which newborn cells detach. These observations  
282 support the hypothesis that epithelia evolutionary predate animals<sup>61</sup>. We propose that correct  
283 compartmentalization and generation of uninuclear offspring necessitates robust nuclear  
284 separation. If warranted true, then a separation mechanism must have coevolved with the origin of  
285 epithelia and was essential for the emergence of multicellularity.

286 Nuclear proliferation in a coenocyte poses a new challenge: How does the cell safeguard the  
287 separation and prevent contact of nuclei while their number increases? Two solutions seem  
288 plausible. On one hand, the cell may control the division axes and separate daughter nuclei along  
289 linear paths which do not cross. On the other hand, the cell may constrain internuclear distance  
290 independent of separation trajectories. Consider two nuclei that are about to divide and separate  
291 their progeny along the spindle axis (Fig. 6a). In a 3-dimensional space, none of the daughter nuclei  
292 may collide unless the spindle axes are both coplanar and non-parallel. Typically, nuclei migrate  
293 only 10–15µm away from the original spindle center before dividing again<sup>28</sup>. This geometric

294 constraint reduces configurations that produce colliding trajectories in a 2-dimensional topology to  
295 about 40% of all possible spindle axis orientations, so that axes intersect at an angle between zero  
296 (collinear) and 70° (Fig. 6b). Adding complexity, spindles in a network with optimal packing face  
297 a number of neighbors (6 in 2D, 12 in 3D) (Fig. 6c). Thus, a synchronously dividing spindle  
298 network will inevitably produce colliding trajectories of daughter nuclei. It is therefore necessary  
299 that, instead of controlling division axes, the cell controls nuclear proximity independently of the  
300 relative orientations they divide (Fig. 6d). This enables the syncytial embryo to divide hundreds of  
301 nuclei synchronously and distribute them to any unoccupied position. Here, we demonstrate a  
302 molecular mechanism that responds to short internuclear distances in the syncytium with a  
303 microtubule dependent repulsion. Each nucleus is associated with a radial array of microtubules  
304 nucleated by the centrosome, which duplicates and forms the two spindle poles in the next division.  
305 Prior, however, this microtubule aster guides nuclear migration and grows large enough to  
306 encounter microtubules from neighboring asters that migrate as well. This encounter leads to  
307 interdigitation of the microtubule plus-ends (antiparallel overlaps) and forms binding sites for  
308 crosslinking proteins. Our data shows that Feo, the PRC1 homolog in *Drosophila* and antiparallel  
309 microtubule crosslinker, plays a central role in defining a minimal internuclear distance in the  
310 syncytial *Drosophila* preblastoderm embryo.

311 Vertebrate PRC1 is a microtubule binding protein with high turnover kinetics and at least 28 times  
312 higher affinity for antiparallel microtubule overlaps than for single microtubules<sup>35</sup>. This  
313 biochemical property, together with fluorescent labeling, renders PRC1 homologs reliable  
314 reporters for microtubule aster overlaps in live cell imaging assays<sup>45</sup>. PRC1 crosslinking  
315 antiparallel microtubules generates a high affinity binding site for the depolymerase and motor  
316 protein Kinesin-4 (Kif4/Xklp1/Klp3A) at the overlap<sup>35,62</sup>. *In vitro*, in addition to maintaining a  
317 stable overlap length, co-activity of PRC1 and Xklp1 cause buckling of overlapping microtubules  
318 which are immobilized at their minus end<sup>35</sup>. In a sliding assay of taxol-stabilized microtubules, in  
319 which microtubules in solution and glass-immobilized microtubules form pairs cross-linked by  
320 PRC1, the antiparallel pairs are slid apart by Kif4<sup>63</sup>. This is reminiscent of plus-end directed sliding  
321 of Kinesin-5<sup>64</sup> and explains the requirement of PRC1 orthologs for spindle elongation in several  
322 species<sup>29,38,39,65</sup>. Indeed, plus-end overlapping microtubules have an apparent mechanical stiffness  
323 that is governed by molecular friction and motor activity<sup>63,66</sup>. An assembly of tens of such  
324 microtubule pairs generates sufficient mechanical resistance against compressive forces in the  
325 nanonewton range, enough to keep two spherical organelles of 5–8 μm diameter and attached to  
326 the microtubule minus-ends (MTOC) well separated<sup>67</sup>. Thus, modular upscaling of a single pair

327 into overlapping radial arrays illustrates how the crosslinking mechanism of a Feo and Klp3A  
328 decorated antiparallel microtubule pair produces a repulsion between two syncytial nuclei.

329 Feo::GFP expressed in the transgenic line, or supplemented as purified protein, exhibits focal  
330 fluorescence signals in the blastoderm embryo and in the explant from preblastoderm embryos.  
331 Here we show that the length of these signal foci is surprisingly short and uniform. According to  
332 *in vitro* data, and neglecting any regulation other than affinity and depolymerase activity for the  
333 underlying microtubule overlap to maintain such a short length, the concentration of Kinesin-4 in  
334 the cytoplasm must be at least one magnitude in excess of Feo<sup>35</sup>. Moreover, partial depletion of  
335 Feo by RNAi abolishes the signal of Klp3A::GFP below detection, thus considerably reducing the  
336 bound fraction of Klp3A at the central spindle. In the embryo, while confirming their already  
337 established localization at the spindle midzone<sup>38,43,56,68,69</sup>, we recorded Klp3A::GFP signal  
338 colocalizing with Feo::mCherry in areas between neighboring spindle asters. However, we could  
339 not clearly assess the localization of Klp3A in explants from preblastoderm embryos due to the low  
340 signal intensity. A single-copy tagged Klp3A construct expressed with the endogenous promoter  
341 failed to provide sufficient signal, and we decided to work with overexpression constructs<sup>70</sup>. This  
342 indicates that the microtubule overlap-bound fraction of endogenous Klp3A is comparatively small  
343 despite the molar excess in the cytosol as derived from overlap length. Together, these observations  
344 point at a protein interaction network localized at antiparallel microtubule overlaps that is sensitive  
345 to small changes of Feo. As Feo binds microtubule overlaps independently<sup>35</sup>, the phenotypes in  
346 intact embryos and in explants could arise due to disproportionate Klp3A perturbation downstream  
347 of Feo. In summary, our live-cell microscopy data from blastoderm embryos and preblastoderm  
348 embryo explants support the conceptual model proposed by Baker et al.<sup>15</sup> built from individual  
349 pairs of microtubules crosslinked and length-regulated by Feo and Klp3A<sup>35</sup>. More importantly, we  
350 show how overlapping microtubules in the aster-aster interaction zone<sup>45</sup> form midzone-analogous  
351 cytoskeletal assemblies that persist throughout blastoderm development. This is particularly  
352 intriguing given that, at the embryo cortex from cycle 10 onwards, actin-based pseudo-furrows  
353 form pre-cellular compartments that are thought to prevent nuclear contact<sup>71-74</sup>. In the early  
354 blastoderm cycles, however, this compartmentalization may not yet be efficient enough to  
355 safeguard nuclear separation, and astral microtubule crosslinking persists as dominant mechanism.  
356 This interpretation is further supported by an earlier observation in mutants of the maternal-effect  
357 gene *sponge*, embryos of which do not form actin caps and pseudo-furrows in blastoderm stage but  
358 depict a homogenous nuclear distribution in cycle 10–11<sup>75</sup>.

359 Feo is essential for central spindle assembly and cytokinesis in somatic cells, containing two Cdk  
360 phosphorylation sites<sup>34</sup>. Feo, like PRC1 in human cells and Ase1p in fission yeast, is under cell  
361 cycle control and undergoes phosphorylation dependent localization from low intensity decoration  
362 of metaphase spindle microtubules to a strong localization at the central spindle in anaphase and  
363 telophase<sup>29,38,39,44,76</sup>. In the present work, we show that the focal localization of Feo and Klp3A  
364 between neighboring nuclei is in synchrony with central spindle localization. It is in this phase of  
365 the division cycle when expanding spindles and separating nuclei cause a large spatial perturbation  
366 to the positional distribution<sup>57,77</sup>. Thus, a dual role for Feo under cell cycle control emerges; while  
367 it targets the central spindle at anaphase onset – forming the spindle midbody – it also binds to  
368 astral microtubule overlaps in a phase during which collision prevention is most needed.

369 In *Drosophila* embryos, spindle elongation at anaphase B is mainly powered by the sliding activity  
370 of Klp61F<sup>78</sup>. Following the mechanism proposed by Baker et al.<sup>15</sup>, and because Klp61F is a  
371 candidate crosslinker and slider of overlapping astral microtubules, we performed RNAi  
372 knockdown in the germline. Reduction of Klp61F levels to 19% of native levels led to lower density  
373 and nonuniform delivery of nuclei to the embryo cortex, confirming its essential role during  
374 preblastoderm development. However, owing to the established role of Klp61F in mitosis, the  
375 RNAi phenotype could emerge as a consequence of multiple chromosome segregation failures that  
376 were undetectable in the preblastoderm embryo. Here, the embryo explant assay overcomes an  
377 experimental limitation and enables time-lapse image acquisition of uni- or binuclear explants  
378 undergoing multiple divisions. Consequently, we could confirm that Klp61F knockdown led to  
379 more frequent division failures rather than shorter nuclear separation. Still, Klp61F and Feo could  
380 functionally cooperate in crosslinking astral microtubules because both proteins recognize and bind  
381 to microtubule pairs, though with different preference for microtubule orientation<sup>35,36,64,79</sup>.  
382 Interestingly, a recent study demonstrated that, while Feo modulates binding and localization of  
383 Klp61F at the spindle midzone in anaphase, Klp61F cannot functionally rescue the absence of  
384 Feo<sup>38</sup>. Presumably, Ase1p/PRC1/Feo binding to microtubule overlaps creates a protein binding hub  
385 for motors and regulators<sup>29,35,40,44,68,80</sup>. This property has not been demonstrated for Kinesin-5  
386 orthologs. Together, the collection of our and other evidence led us to conclude that Klp61F is not  
387 at the core of astral microtubule driven nuclear separation.

388 Lastly, the reader may wonder how astral microtubule overlap crosslinking by Feo and Klp3A  
389 defines the internuclear distance metric, leading to a distribution of syncytial nuclei with high  
390 regularity. In an earlier study, Telley et al.<sup>28</sup> showed that microtubule aster size varies throughout  
391 the nuclear division cycle, reaching a maximum of  $11 \pm 3 \mu\text{m}$  in telophase. Herein, the aster size

392 represents the length distribution of microtubules which, for dynamic microtubules with non-  
393 growing minus-end, is well approximated with an exponential distribution<sup>81</sup>. We assume that two  
394 microtubules from neighboring asters grow at least to average length, overlap with their plus-ends  
395 and are collinear. If the overlap length is stably  $\sim 1 \mu\text{m}$ , then the total length from centrosome to  
396 centrosome is on average  $21 \pm 4 \mu\text{m}$ . Considering that a centrosome is  $\sim 1 \mu\text{m}$  large, and that a  
397 nucleus in late telophase is  $5 \pm 1 \mu\text{m}$  in diameter, the total distance between the centers of  
398 neighboring nuclei is  $28 \pm 4 \mu\text{m}$ . This estimate is in good agreement with the internuclear distance  
399 distribution measured from center to center of each nucleus (Fig. 3c), the minimal non-sibling  
400 internuclear distance in extract (Fig. 4h) and earlier reported separation distances of daughter  
401 nuclei<sup>28</sup>. Thus, the short antiparallel overlap length of microtubules from neighboring asters and  
402 the microtubule length distribution are sufficient to explain the geometry of nuclear distribution in  
403 the *Drosophila* syncytial embryo.

## 404 **Methods**

405 **Fly husbandry:** Rearing of flies for general maintenance was done as previously described<sup>82</sup>. The  
406 following fly lines used to make recombinants or trans-heterozygotes were used: Jupiter::GFP  
407 (BDSC# 6836), H2Av::RFP (BDSC# 23650), Feo::GFP (BDSC# 59274), Feo::mCherry (BDSC#  
408 59277), Klp61F::GFP (BDSC# 35509), Klp3A::GFP (VDRC# 318352), RNAi targeting Feo  
409 (BDSC# 35467), RNAi targeting Klp3A (BDSC# 40944), RNAi targeting Klp3A (BDSC# 43230),  
410 RNAi targeting Klp61F (BDSC# 35804), RNAi targeting Klp61F (BDSC# 33685), RNAi targeting  
411 mCherry (BDSC# 35785), UASp-GFP (BDSC# 35786).

412 **RNAi experiments:** Knockdown experiments were performed using the TRiPGermline fly lines  
413 for RNAi in germline cells<sup>83</sup>. The UAS-hairpin against a gene of interest was expressed using V32-  
414 Gal4 (gift from M. Bettencourt Dias) at 25°C. The expression profile of V32-Gal4 in the oocyte  
415 was assessed by dissecting ovaries of flies expressing UASp-GFP at 25°C and comparing GFP  
416 expression at different developmental stages with fluorescence microscopy.

417 **Sample preparation and extraction:** Embryos were collected from apple juice agar plates  
418 mounted on a fly cage. They were dechorionated in 7% sodium hypochlorite solution, aligned and  
419 immobilized on a clean coverslip using adhesive dissolved in heptane and covered with halocarbon  
420 oil (Votalef 10S). Extraction of cytoplasm from individual embryos and generation of explants  
421 was performed on a custom-made microscope as previously described<sup>46,58</sup>.

422 **Image acquisition:** Transmission light microscopy images were obtained with a 10x 0.25NA  
423 objective, and the polarizer and analyzer of the microscope in crossed configuration. Time-lapse

424 confocal fluorescence Z stacks were acquired on a Yokogawa CSU-W1 spinning disk confocal  
425 scanner with 488 nm, 561 nm and 640 nm laser lines. Images of whole embryos were acquired  
426 with a 40x 1.3NA oil immersion objective. Images of embryo explants were acquired with a 60x  
427 1.2NA or a 40x 1.15NA water immersion objective. Images were recorded with an Andor iXon3  
428 888 EMCCD 1024x1024 camera with 13  $\mu\text{m}$  square pixel size, and a 2x magnification in front of  
429 the camera except for images used in the analysis of Fig. 5e-h and Supp. Fig. 5b, which were taken  
430 by a 20x 0.75NA multi-immersion objective with an Andor Zyla sCMOS 2048x2048 camera with  
431 6.5  $\mu\text{m}$  square pixel size.

432 **Image processing:** Image processing i.e. making Z-projections, image cropping, image down-  
433 sampling, and video generation, was performed in Fiji<sup>84</sup>. Whole embryo images for knockdown  
434 experiments were obtained by pairwise stitching using a plugin in Fiji.

435 **Image analysis:** The fluorescence signal of Feo::GFP in explants was analyzed with the line profile  
436 tool in Fiji. First, images of dividing nuclei during anaphase or telophase were filtered with a  
437 Gaussian kernel ( $\sigma = 1.2$ ). Spot-like signals located between non-sibling nuclei were identified  
438 and, where spots were non-circular, a line was drawn along the longer axis. The angle of the line  
439 relative to the image coordinate system was recorded, and an intensity profile was generated.  
440 Profiles were aligned relative to the position of highest intensity and averaged. For each image, an  
441 intensity profile from a location void of microtubule signal was generated to obtain the background  
442 and the standard deviation of Feo::GFP intensity. Finally, the size of the spot was determined by  
443 calculating the width of the curve where the intensity was higher than two times the standard  
444 deviation of the background. The angle of every profile line was transformed relative to the closer  
445 of the two axes that connect the centrosome of one nucleus with the centrosome of the two  
446 neighboring sister nuclei (Fig. 1c). A probability density plot of all these relative angles was  
447 generated in MATLAB<sup>®</sup>.

448 The nuclear density in whole embryo images was obtained by measuring the area of the visible  
449 part of the embryo after manually tracing the border and dividing the number of nuclei by this area.  
450 The localization of nuclei in whole embryos was performed manually in Fiji. The precision of  
451 localization was 0.25  $\mu\text{m}$  (intra-operator variability). Localization coordinates were imported into  
452 MATLAB<sup>®</sup> and transformed with respect to the coordinate system of the embryo, as defined by  
453 the anterior pole as coordinate origin, and the anterior-posterior axis as  $x$ -axis. The first-order  
454 internuclear distances were obtained from the triangulation connectivity list ('delaunay' function),  
455 while excluding any edge connections, and by calculating the distance between the remaining  
456 connections. The cumulative distribution function of internuclear distances from individual

457 embryos was obtained with the ‘ecdf’ function in MATLAB<sup>®</sup>. An average cumulative distribution  
458 function from several embryos was generated by pooling all distances. Next, the deviation of the  
459 centroid of nuclear positions from the anatomical center of the embryo was obtained using the  
460 formula

$$461 \quad [M_x, M_y] = [C_x, 0] - \left[ \frac{1}{n} \sum_{i=1}^n x_i, \frac{1}{n} \sum_{i=1}^n y_i \right]$$

462 whereby an estimate for the anatomical center of the embryo,  $[C_x, 0]$  with respect to the embryo  
463 coordinate system, is given by half the pole-to-pole distance on the  $x$ -axis and zero on the  $y$ -axis.  
464 The third-order moment of the distribution of nuclear coordinates was calculated with the  
465 ‘skewness’ function in MATLAB<sup>®</sup>, providing a measure for left-right asymmetry.

466 The measurement of inter-nuclear distances in embryo explants was performed manually in Fiji.  
467 The precision of distance measurement was  $\pm 0.12 \mu\text{m}$  as determined by repeated measurement  
468 (intra-operator variability). The intensity profile plots of Klp3A::GFP in the Feo RNAi background  
469 were obtained using the line profile tool in Fiji, by drawing a line between daughter nuclei in the  
470 red (H2Av::RFP) channel and generating an intensity profile plot in the green channel, aligning  
471 these profiles according to the peak intensity and averaging profiles from different locations and  
472 embryos.

473 Plots of aligned quadrilaterals were generated with MATLAB<sup>®</sup> by coordinate transformation. The  
474 area was calculated using the Gauss trapezoidal formula for general polygons:

$$475 \quad A = \frac{1}{2} \left| \sum_{i=1}^{n-1} x_i y_{i+1} + x_n y_1 - \sum_{i=1}^{n-1} x_{i+1} y_i + x_1 y_n \right|$$

476 While  $n = 4$  for ‘quadrilaterals’. For each quadrilateral, representing two sets of dividing nuclei,  
477 the average of the two involved mitotic separation distances and the average of the two involved  
478 non-sibling separations were calculated and plotted. All graphs were made with MATLAB<sup>®</sup>.

479 **Statistical Analysis:** A Wilcoxon rank-sum test was performed with MATLAB<sup>®</sup> starting with a  
480 significance level  $\alpha = 0.05$ .

481 **Quantitative PCR:** To measure the transcript levels of *feo*, *kfp3A* and *kfp61F*, total RNA was  
482 extracted following standard procedures (PureLink RNA Mini Kit, Ambion) from embryos  
483 collected after 40 minutes of egg laying. A cDNA library was made from Oligo(dT)12–18 as  
484 described in the manufacturer's protocol (Transcriptor First Strand cDNA Synthesis Kit, Roche).  
485 Quantitative PCR was performed using Quantifast SYBR Green PCR Kit (204052) and QuantiTect

486 Primers for *feo* (QT00919758) in Feo RNAi (35467), *k1p3A* (QT00497154) in K1p3A RNAi  
487 (40944) and K1p3A RNAi (43230) and *k1p61F* (QT00955822) in K1p61F RNAi (35804) and  
488 K1p61F RNAi (35685). Actin (QT00498883) was used as a house-keeping gene control.

489 **Cloning, overexpression and purification of sFeoFL::GFP-His<sub>6</sub> and sFeoDN::GFP-His<sub>6</sub>:** The  
490 full coding sequence of the *feo* gene fused to a C-terminal GFP tag, was synthesized and codon  
491 optimized by NZYTech, referred to herein as sFeoFL::GFP. The DNA was cloned into the vector  
492 pET-21a containing a C-terminal His<sub>6</sub>-tag, and transformed into *E.coli Rosetta* cells. The coding  
493 sequence of the *feo* gene without the initial 73 N-terminal residues, referred here as truncated or  
494 monomeric sFeoDN::GFP construct, was amplified from the synthesized sFeoFL::GFP construct  
495 and re-cloned into the pET-21a vector. Both proteins were produced by IPTG induction at 25°C.  
496 After 4h of incubation, the cells were harvested and resuspended in lysis buffer (100mM K-HEPES  
497 pH 7.4, 500 mM NaCl, 10% glycerol, 0.1% Triton X-100, 3 M urea, supplemented with protease  
498 inhibitors (Roche) and 100U of DNase type I (NZYTech)). The cells were lysed using the digital  
499 sonifier® (SLPe, Branson) at 70% amplitude with 6 pulses of [30 sec on]-[30 sec off] and clarified  
500 by centrifugation at 30'000g for 45 minutes at 4°C. For purification of the truncated construct, the  
501 supernatant was loaded onto a 5 ml HiTrap Chelating HP (GE Healthcare) charged with 0.1 mM  
502 NiCl<sub>2</sub> and equilibrated with wash buffer (100 mM K-HEPES pH7.4, 500 mM NaCl, 10% glycerol,  
503 40 mM imidazole, 1 mM 2-mercaptoethanol), extensively washed with this buffer and eluted with  
504 elution buffer (100 mM K-HEPES pH7.4, 500 mM NaCl, 10% glycerol, 500 mM imidazole, 1 mM  
505 2-mercaptoethanol) throughout a gradient of 6 CV. For purification of the full-length construct, the  
506 supernatant was loaded onto a 1 ml HiTrap TALON crude (GE Healthcare) charged with 50 mM  
507 CoCl<sub>2</sub> and equilibrated with wash buffer (100 mM K-HEPES pH 7.2, 500 mM NaCl, 10% glycerol,  
508 5 mM imidazole, 1 mM 2-mercaptoethanol), extensively washed with this buffer and eluted with  
509 elution buffer (100 mM K-HEPES pH 7.2, 500 mM NaCl, 10% glycerol, 150 mM imidazole, 1  
510 mM 2-mercaptoethanol), throughout a gradient of 20 CV. Fractions containing the protein of  
511 interest were pooled, the buffer exchanged into embryo explant compatible buffer (100 mM K-  
512 HEPES pH 7.8, 1 mM MgCl<sub>2</sub>, 100 mM KCl) using a PD-10 desalting column (GE Healthcare) and  
513 concentrated using a 50K MWCO Amicon® Ultracentrifugal filter (Merck). The purifications were  
514 performed using the ÄKTApurifier protein purification system (GE Healthcare) and the  
515 chromatographic profile of both proteins was followed by measuring the absorbance at 280 nm,  
516 254 nm and 488 nm in the UV-900 monitor. The size exclusion method resulted in Feo constructs  
517 strongly associated to an unknown contaminant at ~50 kDa. The concentration of each construct  
518 was estimated ~50% of the total measured protein concentration based on band analysis of SDS-



519 PAGE. Total protein concentrations were measured with a NanoDrop2000 UV-Vis  
520 spectrophotometer (ThermoFisher).

521 **Addition of exogenous proteins:** Purified porcine Tubulin (Cytoskeleton) was labeled with Alexa-  
522 647 (Invitrogen, ThermoFisher) following a published protocol<sup>85</sup> and injected into embryos or  
523 explants at 0.3–0.8 mg/ml. Purified sFeoFL::GFP and sFeoDN::GFP were injected at 2 mg/ml in  
524 EC buffer in embryos or explants. For embryos, the injected volume assumed a spherical shape  
525 with diameter  $D \approx 0.018$  mm, resulting an injection volume of  $3.05 \times 10^{-6}$  mm<sup>3</sup>. The average length  
526 and width of the embryo are 0.5 mm and 0.2 mm, respectively<sup>86</sup>. Assuming an ellipsoid geometry  
527 for the embryo, its volume is  $\sim 10^{-2}$  mm<sup>3</sup>. Thus, the final concentration of injected protein after  
528 equilibration in the entire embryo was 5–6 nM. For explants, both protein constructs were added  
529 to explant cytoplasm at 1:200 (vol/vol), resulting in a final concentration in the cytoplasm of 100–  
530 200 nM. Importantly, such an excess of full-length Feo protein preserved nuclear divisions and  
531 distribution.

## 532 **References**

- 533 1. Gundersen, G. G. & Worman, H. J. Nuclear positioning. *Cell* **152**, 1376–1389 (2013).
- 534 2. Bone, C. R. & Starr, D. A. Nuclear migration events throughout development. *J. Cell Sci.*  
535 **129**, 1951–1961 (2016).
- 536 3. Minc, N., Burgess, D. & Chang, F. Influence of cell geometry on division-plane positioning.  
537 *Cell* **144**, 414–426 (2011).
- 538 4. Almonacid, M. *et al.* Active diffusion positions the nucleus in mouse oocytes. *Nat. Cell Biol.*  
539 **17**, 470–479 (2015).
- 540 5. Levy, J. R. & Holzbaur, E. L. F. Dynein drives nuclear rotation during forward progression  
541 of motile fibroblasts. *J. Cell Sci.* **121**, 3187–3195 (2008).
- 542 6. Starr, D. A. & Han, M. Role of ANC-1 in tethering nuclei to the actin cytoskeleton. *Science*  
543 **298**, 406–409 (2002).
- 544 7. Almonacid, M. *et al.* Active Fluctuations of the Nuclear Envelope Shape the Transcriptional  
545 Dynamics in Oocytes. *Dev. Cell* **51**, 145–157.e10 (2019).
- 546 8. Neelam, S. *et al.* Direct force probe reveals the mechanics of nuclear homeostasis in the  
547 mammalian cell. *Proc. Natl. Acad. Sci. U.S.A.* **112**, 5720–5725 (2015).
- 548 9. Starr, D. A. & Fridolfsson, H. N. Interactions between nuclei and the cytoskeleton are  
549 mediated by SUN-KASH nuclear-envelope bridges. *Annu. Rev. Cell Dev. Biol.* **26**, 421–444  
550 (2010).

- 551 10. Pecreaux, J. *et al.* The Mitotic Spindle in the One-Cell *C. elegans* Embryo Is Positioned with  
552 High Precision and Stability. *Biophys. J.* **111**, 1773–1784 (2016).
- 553 11. Dassow, von, G. *et al.* Action at a distance during cytokinesis. *J. Cell Biol.* **187**, 831–845  
554 (2009).
- 555 12. Wühr, M., Dumont, S., Groen, A. C., Needleman, D. J. & Mitchison, T. J. How does a  
556 millimeter-sized cell find its center? *Cell Cycle* **8**, 1115–1121 (2009).
- 557 13. Gibeaux, R., Politi, A. Z., Philippsen, P. & Nedelec, F. Mechanism of nuclear movements in  
558 a multinucleated cell. *Mol. Biol. Cell* **28**, 645–660 (2017).
- 559 14. Foe, V. E. & Alberts, B. M. Studies of nuclear and cytoplasmic behaviour during the five  
560 mitotic cycles that precede gastrulation in *Drosophila* embryogenesis. *J. Cell Sci.* **61**, 31–70  
561 (1983).
- 562 15. Baker, J., Theurkauf, W. E., Theurkauf, W. E. & Schubiger, G. Dynamic changes in  
563 microtubule configuration correlate with nuclear migration in the preblastoderm *Drosophila*  
564 embryo. *J. Cell Biol.* **122**, 113–121 (1993).
- 565 16. Lecuit, T. & Wieschaus, E. Polarized insertion of new membrane from a cytoplasmic  
566 reservoir during cleavage of the *Drosophila* embryo. *J. Cell Biol.* **150**, 849–860 (2000).
- 567 17. Callaini, G., Dallai, R. & Riparbelli, M. G. Cytochalasin induces spindle fusion in the  
568 syncytial blastoderm of the early *Drosophila* embryo. *Biol. Cell* **74**, 249–254 (1992).
- 569 18. Kankel, M. W., Duncan, D. M. & Duncan, I. A screen for genes that interact with the  
570 *Drosophila* pair-rule segmentation gene *fushi tarazu*. *Genetics* **168**, 161–180 (2004).
- 571 19. Bhat, K. M. *et al.* The GAGA factor is required in the early *Drosophila* embryo not only for  
572 transcriptional regulation but also for nuclear division. *Development* **122**, 1113–1124 (1996).
- 573 20. Kao, L.-R. & Megraw, T. L. Centrocortin cooperates with centrosomin to organize  
574 *Drosophila* embryonic cleavage furrows. *Curr. Biol.* **19**, 937–942 (2009).
- 575 21. Megraw, T. L., Li, K., Kao, L. R. & Kaufman, T. C. The centrosomin protein is required for  
576 centrosome assembly and function during cleavage in *Drosophila*. *Development* **126**, 2829–  
577 2839 (1999).
- 578 22. Vaizel-Ohayon, D. & Schejter, E. D. Mutations in centrosomin reveal requirements for  
579 centrosomal function during early *Drosophila* embryogenesis. *Curr. Biol.* **9**, 889–898 (1999).
- 580 23. Dassow, von, G. & Schubiger, G. How an actin network might cause fountain streaming and  
581 nuclear migration in the syncytial *Drosophila* embryo. *J. Cell Biol.* **127**, 1637–1653 (1994).
- 582 24. Hatanaka, K. & Okada, M. Retarded nuclear migration in *Drosophila* embryos with aberrant  
583 F-actin reorganization caused by maternal mutations and by cytochalasin treatment.  
584 *Development* **111**, 909–920 (1991).

- 585 25. Royou, A., Field, C., Sisson, J. C., Sullivan, W. & Karess, R. Reassessing the role and  
586 dynamics of nonmuscle myosin II during furrow formation in early *Drosophila* embryos.  
587 *Mol. Biol. Cell* **15**, 838–850 (2004).
- 588 26. Wheatley, S., Kulkarni, S. & Karess, R. *Drosophila* nonmuscle myosin II is required for rapid  
589 cytoplasmic transport during oogenesis and for axial nuclear migration in early embryos.  
590 *Development* **121**, 1937–1946 (1995).
- 591 27. Deneke, V. E. *et al.* Self-Organized Nuclear Positioning Synchronizes the Cell Cycle in  
592 *Drosophila* Embryos. *Cell* **177**, 925–941.e17 (2019).
- 593 28. Telley, I. A., Gáspár, I., Ephrussi, A. & Surrey, T. Aster migration determines the length  
594 scale of nuclear separation in the *Drosophila* syncytial embryo. *J. Cell Biol.* **197**, 887–895  
595 (2012).
- 596 29. Khmelinskii, A., Roostalu, J., Roque, H., Antony, C. & Schiebel, E. Phosphorylation-  
597 dependent protein interactions at the spindle midzone mediate cell cycle regulation of spindle  
598 elongation. *Dev. Cell* **17**, 244–256 (2009).
- 599 30. Scholey, J. M., Civelekoglu-Scholey, G. & Brust-Mascher, I. Anaphase B. *Biology (Basel)*  
600 **5**, 51 (2016).
- 601 31. Cheerambathur, D. K., Gassmann, R., Cook, B., Oegema, K. & Desai, A. Crosstalk between  
602 microtubule attachment complexes ensures accurate chromosome segregation. *Science* **342**,  
603 1239–1242 (2013).
- 604 32. Reinemann, D. N. *et al.* Collective Force Regulation in Anti-parallel Microtubule Gliding by  
605 Dimeric Kif15 Kinesin Motors. *Curr. Biol.* **27**, 2810–2820.e6 (2017).
- 606 33. Tao, L. *et al.* A homotetrameric kinesin-5, KLP61F, bundles microtubules and antagonizes  
607 Ncd in motility assays. *Curr. Biol.* **16**, 2293–2302 (2006).
- 608 34. Vernì, F. *et al.* Feo, the *Drosophila* homolog of PRC1, is required for central-spindle  
609 formation and cytokinesis. *Curr. Biol.* **14**, 1569–1575 (2004).
- 610 35. Bieling, P., Telley, I. A. & Surrey, T. A minimal midzone protein module controls formation  
611 and length of antiparallel microtubule overlaps. *Cell* **142**, 420–432 (2010).
- 612 36. Subramanian, R. *et al.* Insights into antiparallel microtubule crosslinking by PRC1, a  
613 conserved nonmotor microtubule binding protein. *Cell* **142**, 433–443 (2010).
- 614 37. Kwon, M. & Scholey, J. M. Spindle mechanics and dynamics during mitosis in *Drosophila*.  
615 *Trends Cell Biol.* **14**, 194–205 (2004).
- 616 38. Wang, H., Brust-Mascher, I. & Scholey, J. M. The microtubule cross-linker Feo controls the  
617 midzone stability, motor composition, and elongation of the anaphase B spindle in  
618 *Drosophila* embryos. *Mol. Biol. Cell* **26**, 1452–1462 (2015).

- 619 39. Zhu, C., Lau, E., Schwarzenbacher, R., Bossy-Wetzell, E. & Jiang, W. Spatiotemporal control  
620 of spindle midzone formation by PRC1 in human cells. *Proc. Natl. Acad. Sci. U.S.A.* **103**,  
621 6196–6201 (2006).
- 622 40. Hu, C.-K., Ozlü, N., Coughlin, M., Steen, J. J. & Mitchison, T. J. Plk1 negatively regulates  
623 PRC1 to prevent premature midzone formation before cytokinesis. *Mol. Biol. Cell* **23**, 2702–  
624 2711 (2012).
- 625 41. Williams, B. C., Dernburg, A. F., Puro, J., Nokkala, S. & Goldberg, M. L. The *Drosophila*  
626 kinesin-like protein KLP3A is required for proper behavior of male and female pronuclei at  
627 fertilization. *Development* **124**, 2365–2376 (1997).
- 628 42. Bringmann, H. *et al.* A kinesin-like motor inhibits microtubule dynamic instability. *Science*  
629 **303**, 1519–1522 (2004).
- 630 43. Kwon, M. *et al.* The chromokinesin, KLP3A, drives mitotic spindle pole separation during  
631 prometaphase and anaphase and facilitates chromatid motility. *Mol. Biol. Cell* **15**, 219–233  
632 (2004).
- 633 44. Subramanian, R., Ti, S.-C., Tan, L., Darst, S. A. & Kapoor, T. M. Marking and measuring  
634 single microtubules by PRC1 and kinesin-4. *Cell* **154**, 377–390 (2013).
- 635 45. Nguyen, P. A. *et al.* Spatial organization of cytokinesis signaling reconstituted in a cell-free  
636 system. *Science* **346**, 244–247 (2014).
- 637 46. de-Carvalho, J., Deshpande, O., Nabais, C. & Telley, I. A. A cell-free system of *Drosophila*  
638 egg explants supporting native mitotic cycles. *Methods Cell Biol.* **144**, 233–257 (2018).
- 639 47. Cheerambathur, D. K., Brust-Mascher, I., Civelekoglu-Scholey, G. & Scholey, J. M.  
640 Dynamic partitioning of mitotic kinesin-5 cross-linkers between microtubule-bound and  
641 freely diffusing states. *J. Cell Biol.* **182**, 429–436 (2008).
- 642 48. Sharp, D. J., Yu, K. R., Sisson, J. C., Sullivan, W. & Scholey, J. M. Antagonistic microtubule-  
643 sliding motors position mitotic centrosomes in *Drosophila* early embryos. *Nature Cell*  
644 *Biology* **1**, 51–54 (1999).
- 645 49. Heck, M. M. *et al.* The kinesin-like protein KLP61F is essential for mitosis in *Drosophila*. *J.*  
646 *Cell Biol.* **123**, 665–679 (1993).
- 647 50. Mavrakakis, M., Rikhy, R. & Lippincott-Schwartz, J. Plasma membrane polarity and  
648 compartmentalization are established before cellularization in the fly embryo. *Dev. Cell* **16**,  
649 93–104 (2009).
- 650 51. Kotadia, S., Crest, J., Tram, U., Riggs, B. & Sullivan, W. *Blastoderm Formation and*  
651 *Cellularisation in Drosophila melanogaster.* **122**, 113– (American Cancer Society, 2001),  
652 ISBN 0470016175.

- 653 52. Staller, M. V. *et al.* Depleting gene activities in early *Drosophila* embryos with the ‘maternal-  
654 Gal4-shRNA’ system. *Genetics* **193**, 51–61 (2013).
- 655 53. Morin, X., Daneman, R., Zavortink, M. & Chia, W. A protein trap strategy to detect GFP-  
656 tagged proteins expressed from their endogenous loci in *Drosophila*. *Proc. Natl. Acad. Sci.*  
657 *U.S.A.* **98**, 15050–15055 (2001).
- 658 54. Schuh, M., Schuh, M., Lehner, C. F. & Heidmann, S. Incorporation of *Drosophila*  
659 CID/CENP-A and CENP-C into centromeres during early embryonic anaphase. *Curr. Biol.*  
660 **17**, 237–243 (2007).
- 661 55. Sawin, K. E., LeGuellec, K., Philippe, M. & Mitchison, T. J. Mitotic spindle organization by  
662 a plus-end-directed microtubule motor. *Nature* **359**, 540–543 (1992).
- 663 56. Williams, B. C., Riedy, M. F., Williams, E. V., Gatti, M. & Goldberg, M. L. The *Drosophila*  
664 kinesin-like protein KLP3A is a midbody component required for central spindle assembly  
665 and initiation of cytokinesis. *J. Cell Biol.* **129**, 709–723 (1995).
- 666 57. Kanesaki, T., Edwards, C. M., Schwarz, U. S. & Grosshans, J. Dynamic ordering of nuclei  
667 in syncytial embryos: a quantitative analysis of the role of cytoskeletal networks. *Integr. Biol.*  
668 **3**, 1112–1119 (2011).
- 669 58. Telley, I. A., Gáspár, I., Ephrussi, A. & Surrey, T. A single *Drosophila* embryo extract for  
670 the study of mitosis *ex vivo*. *Nat. Protoc.* **8**, 310–324 (2013).
- 671 59. Hehenberger, E., Kradolfer, D. & Köhler, C. Endosperm cellularization defines an important  
672 developmental transition for embryo development. *Development* **139**, 2031–2039 (2012).
- 673 60. Dudin, O. *et al.* A unicellular relative of animals generates a layer of polarized cells by  
674 actomyosin-dependent cellularization. *Elife* **8**, 3123 (2019).
- 675 61. Dickinson, D. J., Nelson, W. J. & Weis, W. I. An epithelial tissue in *Dictyostelium* challenges  
676 the traditional origin of metazoan multicellularity. *Bioessays* **34**, 833–840 (2012).
- 677 62. Kurasawa, Y., Earnshaw, W. C., Mochizuki, Y., Dohmae, N. & Todokoro, K. Essential roles  
678 of KIF4 and its binding partner PRC1 in organized central spindle midzone formation. *EMBO*  
679 *J.* **23**, 3237–3248 (2004).
- 680 63. Wijeratne, S. & Subramanian, R. Geometry of antiparallel microtubule bundles regulates  
681 relative sliding and stalling by PRC1 and Kif4A. *Elife* **7**, 37782 (2018).
- 682 64. Kapitein, L. C. *et al.* The bipolar mitotic kinesin Eg5 moves on both microtubules that it  
683 crosslinks. *Nature* **435**, 114–118 (2005).
- 684 65. Schuyler, S. C., Liu, J. Y. & Pellman, D. The molecular function of Ase1p: evidence for a  
685 MAP-dependent midzone-specific spindle matrix. Microtubule-associated proteins. *J. Cell*  
686 *Biol.* **160**, 517–528 (2003).

- 687 66. Forth, S., Hsia, K.-C., Shimamoto, Y. & Kapoor, T. M. Asymmetric friction of nonmotor  
688 MAPs can lead to their directional motion in active microtubule networks. *Cell* **157**, 420–  
689 432 (2014).
- 690 67. Lele, T. P., Dickinson, R. B. & Gundersen, G. G. Mechanical principles of nuclear shaping  
691 and positioning. *J. Cell Biol.* **217**, 3330–3342 (2018).
- 692 68. D’Avino, P. P. *et al.* Recruitment of Polo kinase to the spindle midzone during cytokinesis  
693 requires the Feo/Klp3A complex. *PLoS ONE* **2**, e572 (2007).
- 694 69. Page, S. L. & Hawley, R. S. The *Drosophila* meiotic mutant mei-352 is an allele of klp3A  
695 and reveals a role for a kinesin-like protein in crossover distribution. *Genetics* **170**, 1797–  
696 1807 (2005).
- 697 70. Sarov, M. *et al.* A genome-wide resource for the analysis of protein localisation in  
698 *Drosophila*. *Elife* **5**, e12068 (2016).
- 699 71. Karr, T. L. & Alberts, B. M. Organization of the cytoskeleton in early *Drosophila* embryos.  
700 *J. Cell Biol.* **102**, 1494–1509 (1986).
- 701 72. Kellogg, D. R., Mitchison, T. J. & Alberts, B. M. Behaviour of microtubules and actin  
702 filaments in living *Drosophila* embryos. *Development* **103**, 675–686 (1988).
- 703 73. Mavrakakis, M., Rikhy, R. & Lippincott-Schwartz, J. Cells within a cell: Insights into cellular  
704 architecture and polarization from the organization of the early fly embryo. *Commun. Integr.*  
705 *Biol.* **2**, 313–314 (2009).
- 706 74. Lecuit, T. Junctions and vesicular trafficking during *Drosophila* cellularization. *J. Cell Sci.*  
707 **117**, 3427–3433 (2004).
- 708 75. Postner, M. A., Miller, K. G., Wieschaus, E. F. & Wieschaus, E. F. Maternal effect mutations  
709 of the sponge locus affect actin cytoskeletal rearrangements in *Drosophila melanogaster*  
710 embryos. *J. Cell Biol.* **119**, 1205–1218 (1992).
- 711 76. Polak, B., Risteski, P., Lesjak, S. & Tolić, I. M. PRC1-labeled microtubule bundles and  
712 kinetochore pairs show one-to-one association in metaphase. *EMBO Rep.* **18**, 217–230  
713 (2017).
- 714 77. Lv, Z. *et al.* The emergent Yo-yo movement of nuclei driven by collective cytoskeletal  
715 remodeling in pseudo-synchronous mitotic cycles. *bioRxiv* **22**, 662965 (2019).
- 716 78. Brust-Mascher, I., Sommi, P., Cheerambathur, D. K. & Scholey, J. M. Kinesin-5-dependent  
717 poleward flux and spindle length control in *Drosophila* embryo mitosis. *Mol. Biol. Cell* **20**,  
718 1749–1762 (2009).
- 719 79. Kellogg, E. H. *et al.* Near-atomic cryo-EM structure of PRC1 bound to the microtubule. *Proc.*  
720 *Natl. Acad. Sci. U.S.A.* **113**, 9430–9439 (2016).

- 721 80. Sasabe, M. & Machida, Y. MAP65: a bridge linking a MAP kinase to microtubule turnover.  
722 *Curr. Opin. Plant Biol.* **9**, 563–570 (2006).
- 723 81. Howard, J. *Mechanics of Motor Proteins and the Cytoskeleton*. Sinauer Associates  
724 Incorporated (2001), ISBN 0-87893-334-4.
- 725 82. Stocker, H. & Gallant, P. Getting started: an overview on raising and handling *Drosophila*.  
726 *Methods Mol. Biol.* **420**, 27–44 (2008).
- 727 83. Perkins, L. A. *et al.* The Transgenic RNAi Project at Harvard Medical School: Resources  
728 and Validation. *Genetics* **201**, 843–852 (2015).
- 729 84. Schindelin, J. *et al.* Fiji: an open-source platform for biological-image analysis. *Nat. Meth.*  
730 **9**, 676–682 (2012).
- 731 85. Hyman, A. A. Preparation of marked microtubules for the assay of the polarity of  
732 microtubule-based motors by fluorescence. *J. Cell Sci. Suppl.* **14**, 125–127 (1991).
- 733 86. Markow, T. A., Beall, S. & Matzkin, L. M. Egg size, embryonic development time and  
734 ovoviviparity in *Drosophila* species. *J. Evol. Biol.* **22**, 430–434 (2008).

735

## 736 **Acknowledgements**

737 We thank members of the Telley lab for fruitful discussions, Jonathon Scholey for constructive  
738 comments on the manuscript and for fly stocks, and Thomas Surrey for discussions throughout the  
739 project. We thank the staff of the Fly Facility, the Advanced Imaging Facility and the Technical  
740 Support Service at the Instituto Gulbenkian de Ciência (IGC). Transgenic fly stocks were obtained  
741 from the Vienna *Drosophila* Resource Center and Bloomington *Drosophila* Stock Center (NIH  
742 P40OD018537). We acknowledge financial support provided by Fundação Calouste Gulbenkian  
743 (FCG), European Commission FP7 Marie Curie CIG to I.A.T. (PCIG13-GA-2013-618743),  
744 Human Frontiers Science Program YIG to I.A.T. (RGY0083/2016), a doctoral fellowship  
745 SFRH/BD/52174/2013 to O.D. from Fundação para a Ciência e a Tecnologia (FCT). We  
746 acknowledge LISBOA-01-0145-FEDER-007654 supporting IGC's core operation, LISBOA-01-  
747 0145-FEDER-022170 (*Congento*) supporting the Fly Facility, and PPBI-POCI-01-0145-FEDER-  
748 022122 supporting the Advanced Imaging Facility, all co-financed by FCT (Portugal) and  
749 Lisboa2020, under the PORTUGAL2020 agreement (European Regional Development Fund).

## 750 **Author contributions**

751 OD, JC and IAT conceived and designed the project. OD and IAT designed experiments and OD  
752 performed them with support from JC. DMV and OD designed, purified and characterized the  
753 protein constructs. OD and IAT prepared the figures and wrote the manuscript.

754



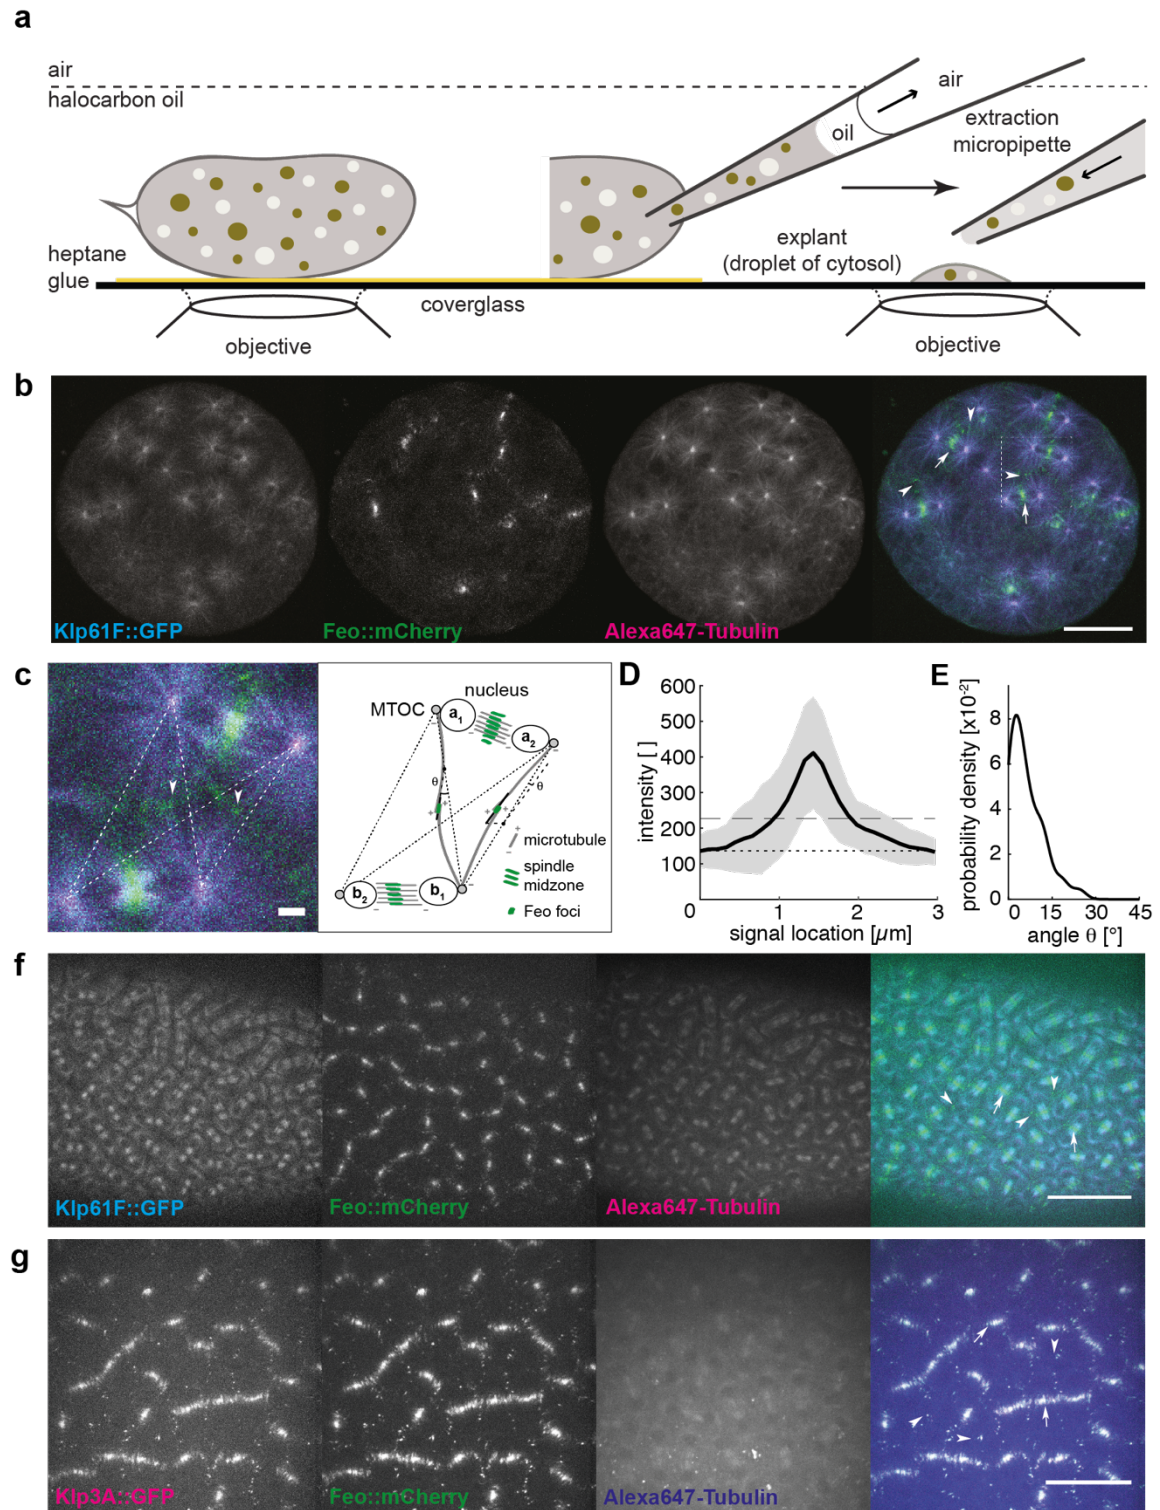

755

756 **Figure 1: Feo, Klp3A and Klp61F localization confirm antiparallel microtubule overlaps**  
757 **between asters of non-sister nuclei.**

758 **a)** Schematic showing a *Drosophila* syncytial embryo immobilized to the coverslip and covered  
759 with a thin layer of halocarbon oil ready for time-lapse microscopy. On the right, an embryo that  
760 is developmentally staged preblastoderm is punctured for extraction and deposition of cytosol on  
761 the coverslip using a micropipette, thereby generating a series of embryo explants. **b)** Three-color  
762 snapshot from a time-lapse (Suppl. Video 1) of an explant generated from an embryo expressing

763 Klp61F::GFP (cyan), Feo::mCherry (green) and injected with Alexa647–Tubulin (magenta). The  
764 antiparallel microtubule crosslinker, Feo, localizes strongly to the spindle midzone during the  
765 anaphase/telophase transition (arrows) and to the intercalating microtubules from neighboring  
766 nuclei (arrowheads). Scale bar, 30  $\mu\text{m}$ . **c**) Zoom-in of the merged color channel image in b) (dashed  
767 square) demonstrating how Feo localizes as intense foci between neighboring spindles, where  
768 microtubules from non-sister nuclei meet (arrowheads). The schematic on the right represents the  
769 configuration shown in the image, exemplifying the location of the two pairs of sister nuclei,  $a^1$ – $a^2$   
770 and  $b^1$ – $b^2$ , and two representative Feo foci. The dashed lines represent the shortest path of  
771 microtubule interactions between the centrosomes (C) of non-sister nuclei. An intensity profile of  
772 the foci is generated by drawing a line (continuous) along the longest axis and centered to the foci.  
773 The angle  $\theta$  relative to the dashed interaction line is determined. Scale bar, 2  $\mu\text{m}$ . **d**) The average  
774 intensity profile of Feo foci indicate a foci length of  $1.0 \pm 0.35 \mu\text{m}$ . The grey area designates the  
775 standard deviation (SD), the dotted line marks the background level, and the dashed line marks two  
776 times SD above the background.  $N = 7$ ;  $n = 57$ . **e**) The distribution of angles ( $\theta$ ) suggests that the  
777 antiparallel microtubule overlaps occur mostly along the connecting line between the neighboring  
778 non-sister nuclei.  $N = 7$ ;  $n = 42$ . Cases where foci were symmetric and a long axis could not be  
779 determined were excluded from the analysis. **f**) Three-color snapshot of a blastoderm embryo  
780 expressing Klp61F::GFP (cyan), Feo::mCherry (green) and injected with Alexa647–Tubulin  
781 (magenta) showing that Feo localizes strongly between sister nuclei as part of the spindle midzone  
782 (arrows) and, more strikingly, between neighboring non-sister nuclei as distinct foci (arrowheads).  
783 Scale bar, 50  $\mu\text{m}$ . Refer to [Suppl. Video 2](#). **g**) Three-color snapshot of a blastoderm embryo  
784 expressing Klp3A::GFP (magenta), Feo::mCherry (green) and injected with Alexa647–Tubulin  
785 (blue) showing that Klp3A co-localizes with Feo at the spindle midzone (arrows) and at the foci  
786 between neighboring non-sister nuclei (arrowheads). Scale bar, 50  $\mu\text{m}$ . Refer to [Suppl. Video 3](#).

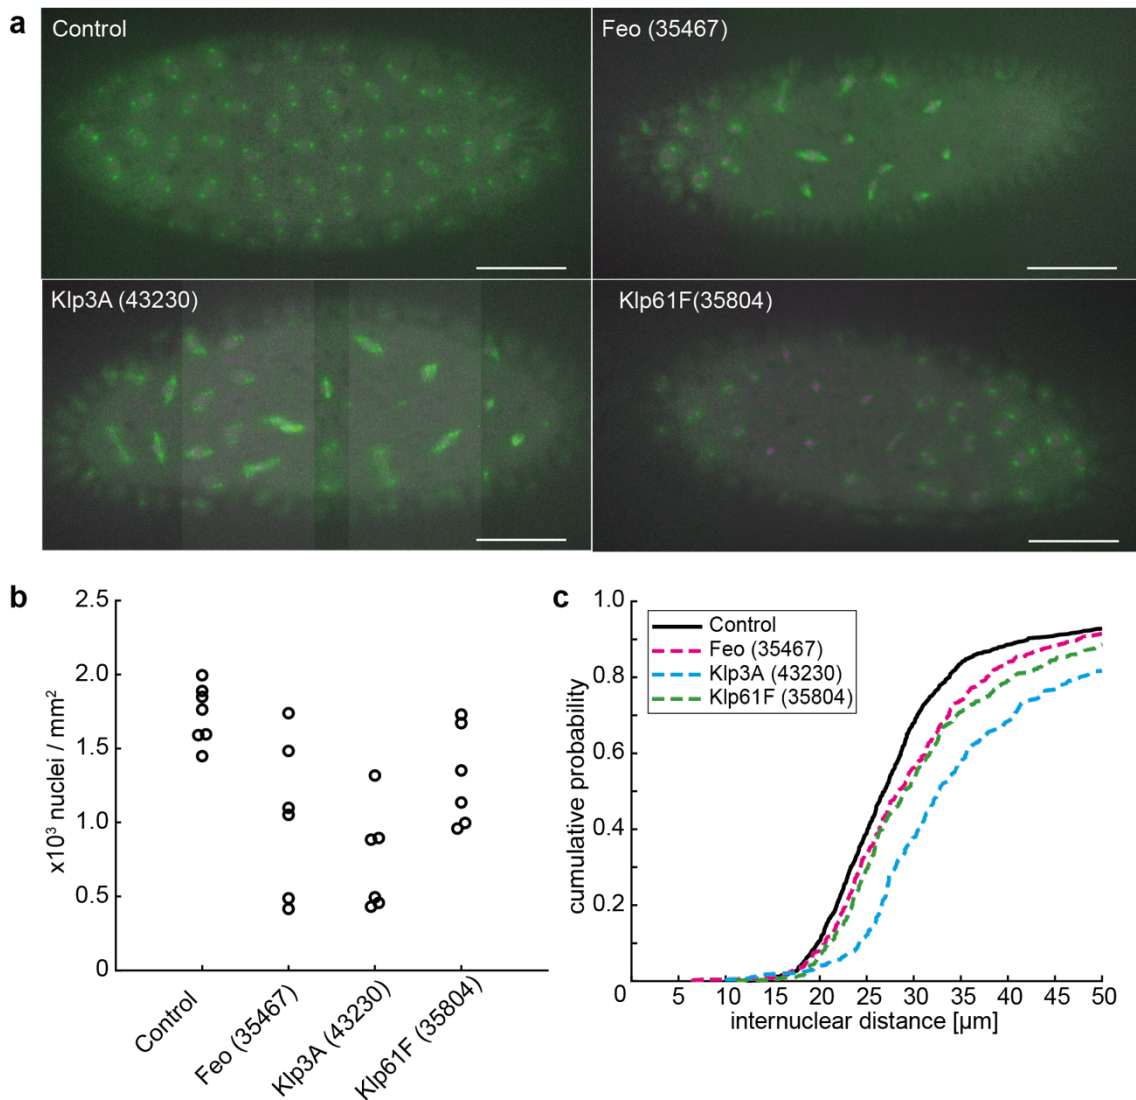

787

788 **Figure 2: Partial knockdown of Feo, Klp3a or Klp61F by RNAi leads to defective nuclear**  
789 **delivery to the embryo cortex.**

790 **a)** Maximum intensity projections from three-dimensional time-lapse movies of embryos partially  
791 depleted of Feo, Klp3A or Klp61F, expressing Jupiter::GFP (green) marking microtubules and  
792 H2Av::RFP (magenta) marking chromatin. Knockdown embryos show irregular nuclear  
793 distribution during the first interphase occurring at the cortex as compared to the regular nuclear  
794 distribution in control embryos (RNAi against mCherry). Scale bar, 50 μm. **b)** A quantification of  
795 the number of nuclei per square millimeter shows a higher degree of variation between the six  
796 embryos knocked down for either of the three genes Feo (35467), Klp3A (43230) or Klp61F  
797 (35804) as compared to control embryos. In all cases the density is decreased on average. Each  
798 data point represents one embryo. **c)** The cumulative probability function of the internuclear  
799 distance between first-order neighbors in embryos depleted of Feo, Klp3A or Klp61F shows on  
800 average a higher internuclear distance. Thus, the number of nuclei at the cortex is smaller with  
801 broader distribution indicating greater irregularity with respect to the control. N = 7 (control), N =  
802 6 (RNAi lines). Refer to [Suppl. Fig. 2 and Video 4](#).

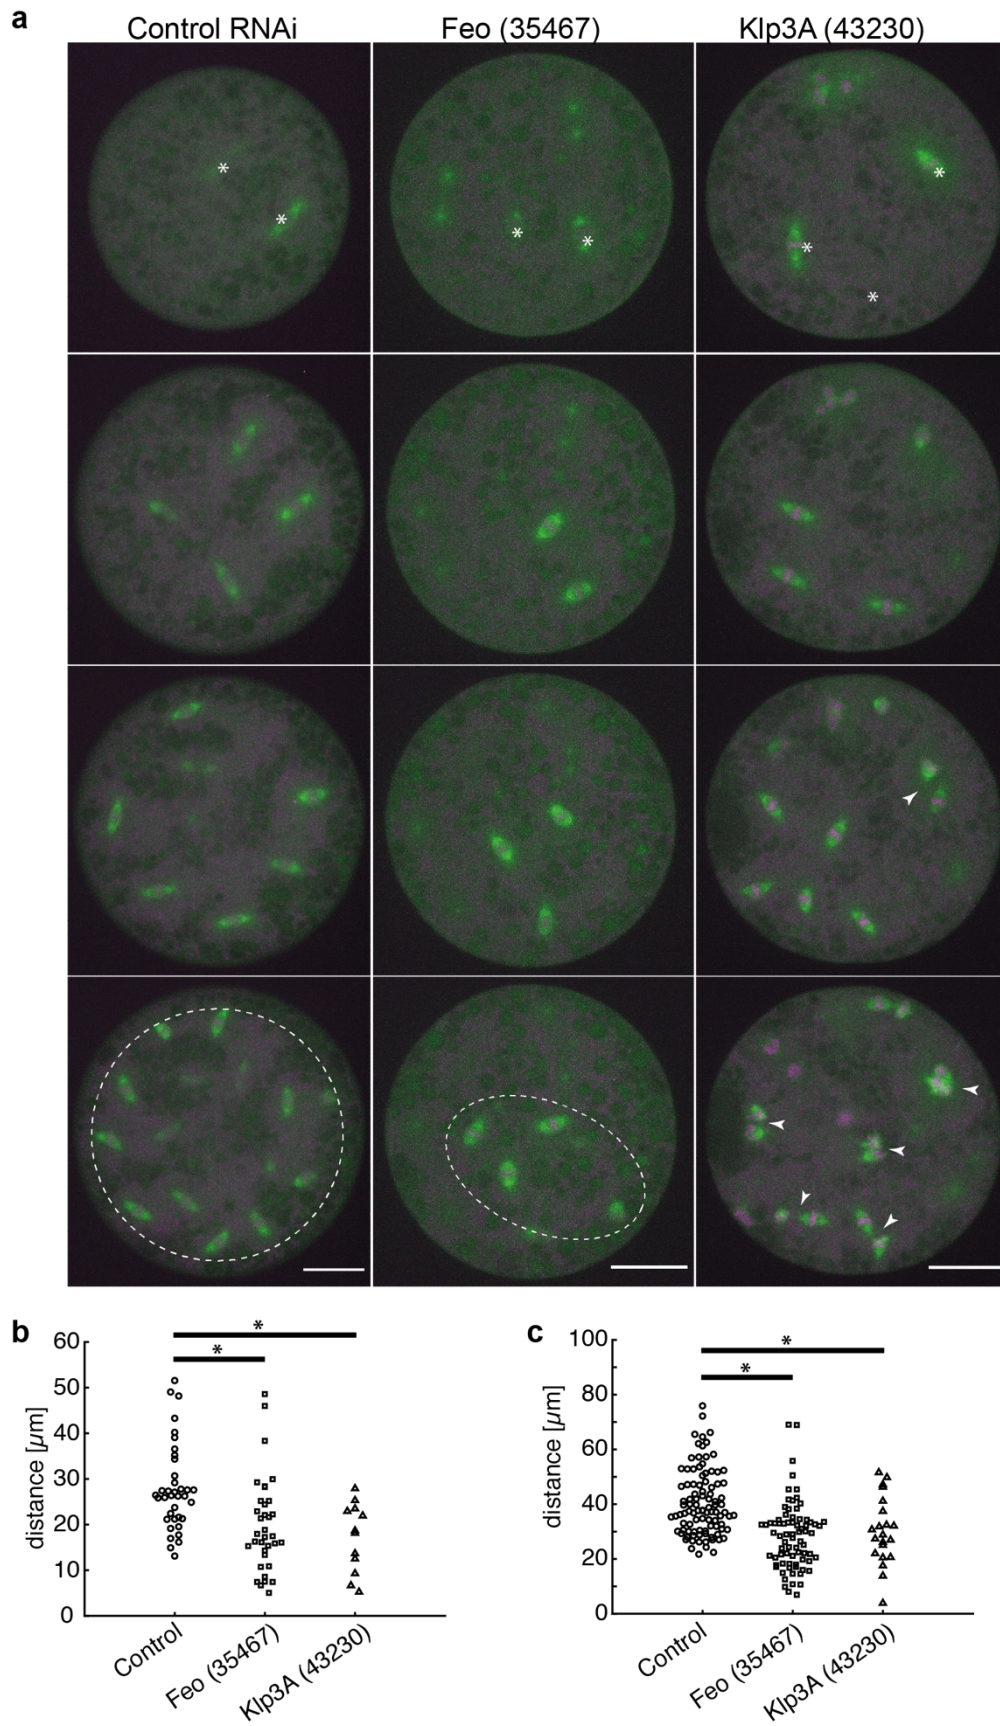

803

804 **Figure 3: Partial knockdown of Feo, Klp3a or Klp61F by RNAi leads to defective nuclear**  
805 **distribution in preblastoderm embryo explants.**

806 **a)** Maximum intensity projections from time-lapse movies of embryo explants under control  
807 conditions and partial depletion of Feo, Klp3A or Klp61F, while expressing Jupiter::GFP (green)  
808 marking microtubules and H2Av::RFP (magenta) marking chromatin. Each panel shows  
809 metaphase of consecutive division. White stars in the first frame mark the position of dividing  
810 nuclei (sometimes out of focus). The control explants (RNAi against mCherry) undergo normal  
811 nuclear divisions and distribute the daughter nuclei within the entire explant volume (dashed  
812 circle). Explants from Feo depleted embryos undergo mitotic nuclear divisions but daughter nuclei  
813 separate less efficiently, leading to a partial occupation of the cytoplasm (dashed ellipse). Explants  
814 from Klp3A depleted embryos undergo mitotic nuclear divisions with slightly less efficient  
815 distribution than in controls and with higher prevalence for spindle fusion (arrowheads). Scale bar,  
816 30  $\mu\text{m}$ ; time in min:sec. **b)** Separation distance between daughter nuclei after mitotic nuclear  
817 division under control conditions and under knockdown for Feo (35467) and Klp3A (43230) in  
818 embryo explants. Separation distance is significantly reduced in both knock-down conditions  
819 (Control: N = 4, n = 38 ; Feo (35467): N = 2, n = 36 ; Klp3A (43230): N = 3, n = 23;  $p < 0.01$ ,  
820 Wilcoxon signed-rank test). **c)** Separation distance between first-neighbor non-sibling nuclei  
821 measured between mitotic divisions under control conditions and under knockdown for Feo  
822 (35467) and Klp3A (43230) in embryo explants. The separation distance is significantly shorter in  
823 both knock-down conditions (Control: N = 3, n = 98 ; Feo (35467): N = 3, n = 77 ; Klp3A (43230):  
824 N = 3, n = 50;  $p < 0.05$ , Wilcoxon signed-rank test) though the effect is stronger when Feo is  
825 depleted.

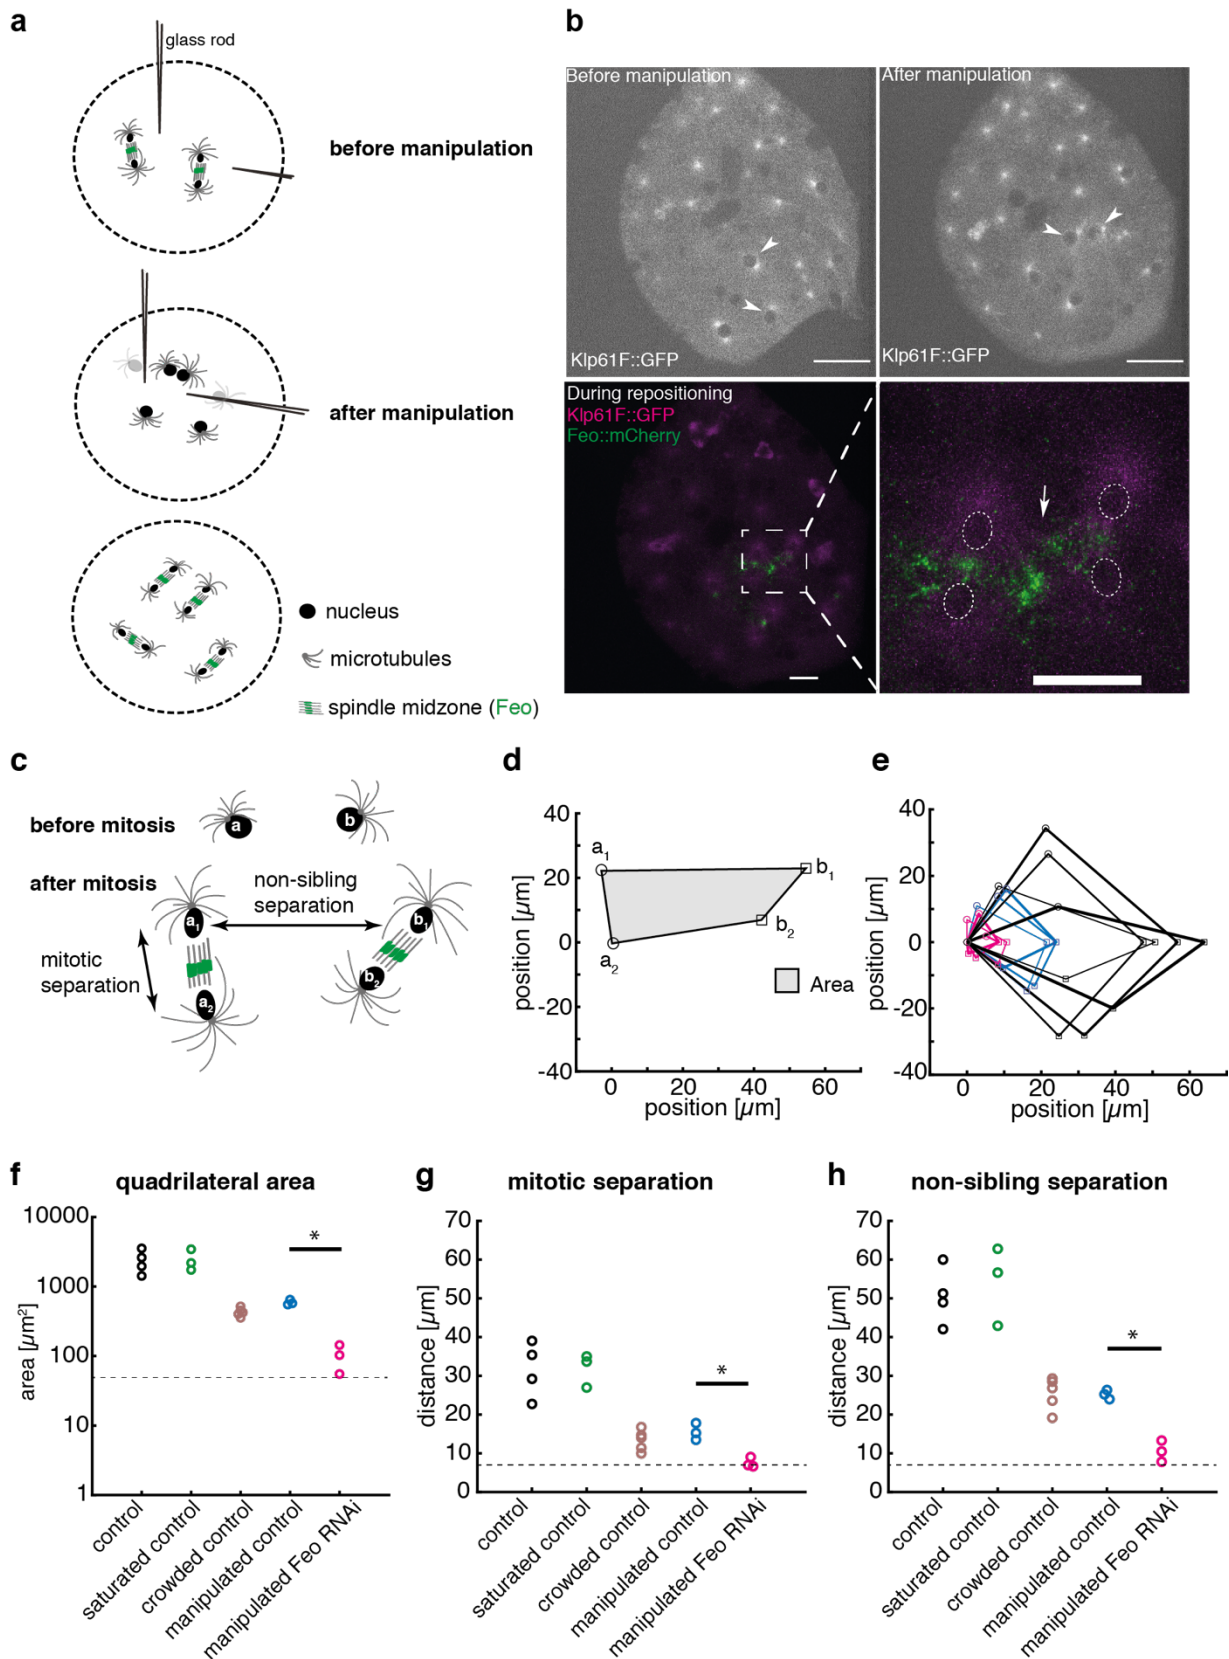

826

827 **Figure 4: Feo depleted explants fail to maintain nuclear separation distance following acute**  
828 **physical manipulation.**

829 **a)** Scheme showing the manipulation of internuclear distance in embryo explants. After a mitotic  
830 division and nuclear separation, two non-sister nuclei are brought close to each other during  
831 anaphase B–telophase by means of two glass rods. Subsequently, nuclei divide again, and daughter  
832 nuclei are separated at defined distances. **b)** Fluorescence images illustrating physical manipulation  
833 of nuclear position in an explant made from an embryo expressing Klp61F::GFP (green) marking  
834 microtubules positively and nuclei negatively due to exclusion (dark disks), together with  
835 Feo::mCherry (magenta). The top row shows the GFP signal before (left) and after (right)  
836 manipulation. Physical manipulation decreased the distance selectively between two nuclei  
837 (arrowheads). Scale bar, 30  $\mu\text{m}$ . Upon conclusion of the next mitosis and during repositioning of  
838 the daughter nuclei (bottom), Feo localizes exclusively between the daughters of manipulated  
839 nuclei (zoom on the right), indicating that microtubule overlaps have formed. In contrast, Feo  
840 localization is not detectable between nuclei that have not been moved and are further apart. Scale  
841 bars, 15  $\mu\text{m}$  **c)** Schematic of the mitotic separation distance and non-sister separation distance.  
842 Nuclei **a** and **b** were brought close to each other and following a division give rise to daughters  $a_1$ ,  
843  $a_2$ , and  $b_1$ ,  $b_2$ , respectively. **d)** Schematic of the quadrilateral area defined by the four nuclei  $a_1$ ,  $a_2$ ,  
844  $b_1$ ,  $b_2$  after mitosis as shown in c). **e)** Overlay of quadrilaterals aligned for coordinate  $a_2$  and rotated  
845 so that the vector  $b_1 - a_2$  matches the  $x$ -axis. Control RNAi experiments without manipulation and  
846 with ample space in the explant are in black ( $N = 4$ ), experiments involving manipulation under  
847 control RNAi conditions are shown in blue ( $N = 3$ ), and manipulations experiments under  
848 knockdown of Feo are shown in magenta ( $N = 3$ ). **f)** Quadrilateral area for five different  
849 experimental conditions. The same color code as in e) applies; additional control conditions without  
850 manipulation in explants almost saturated with nuclei ( $N = 3$ ) and in explants crowded with nuclei  
851 ( $N = 5$ ) are shown in green and brown, respectively. The dashed line designates the lower boundary  
852 where the four nuclei touch each other. **g)** The average mitotic separation distance between the  
853 dividing nuclei ( $|a_1 - a_2|$ ;  $|b_1 - b_2|$ ) is reduced in the manipulated Feo RNAi condition and is close to  
854 the lower limit of separation (nuclear diameter) where the nuclei are touching each other. In  
855 contrast, sister nuclei are separated in all the control conditions. The color code is the same as in  
856 f). **h)** The average non-sister separation between the dividing nuclei ( $|a_1 - b_1|$ ;  $|a_2 - b_2|$ ) is reduced in  
857 the manipulated Feo RNAi condition and is close to the lower limit of separation where the nuclei  
858 are touching each other. In the control, the distance between the non-sister nuclei is  $\sim 25 \mu\text{m}$ . The  
859 color code is the same as in f).

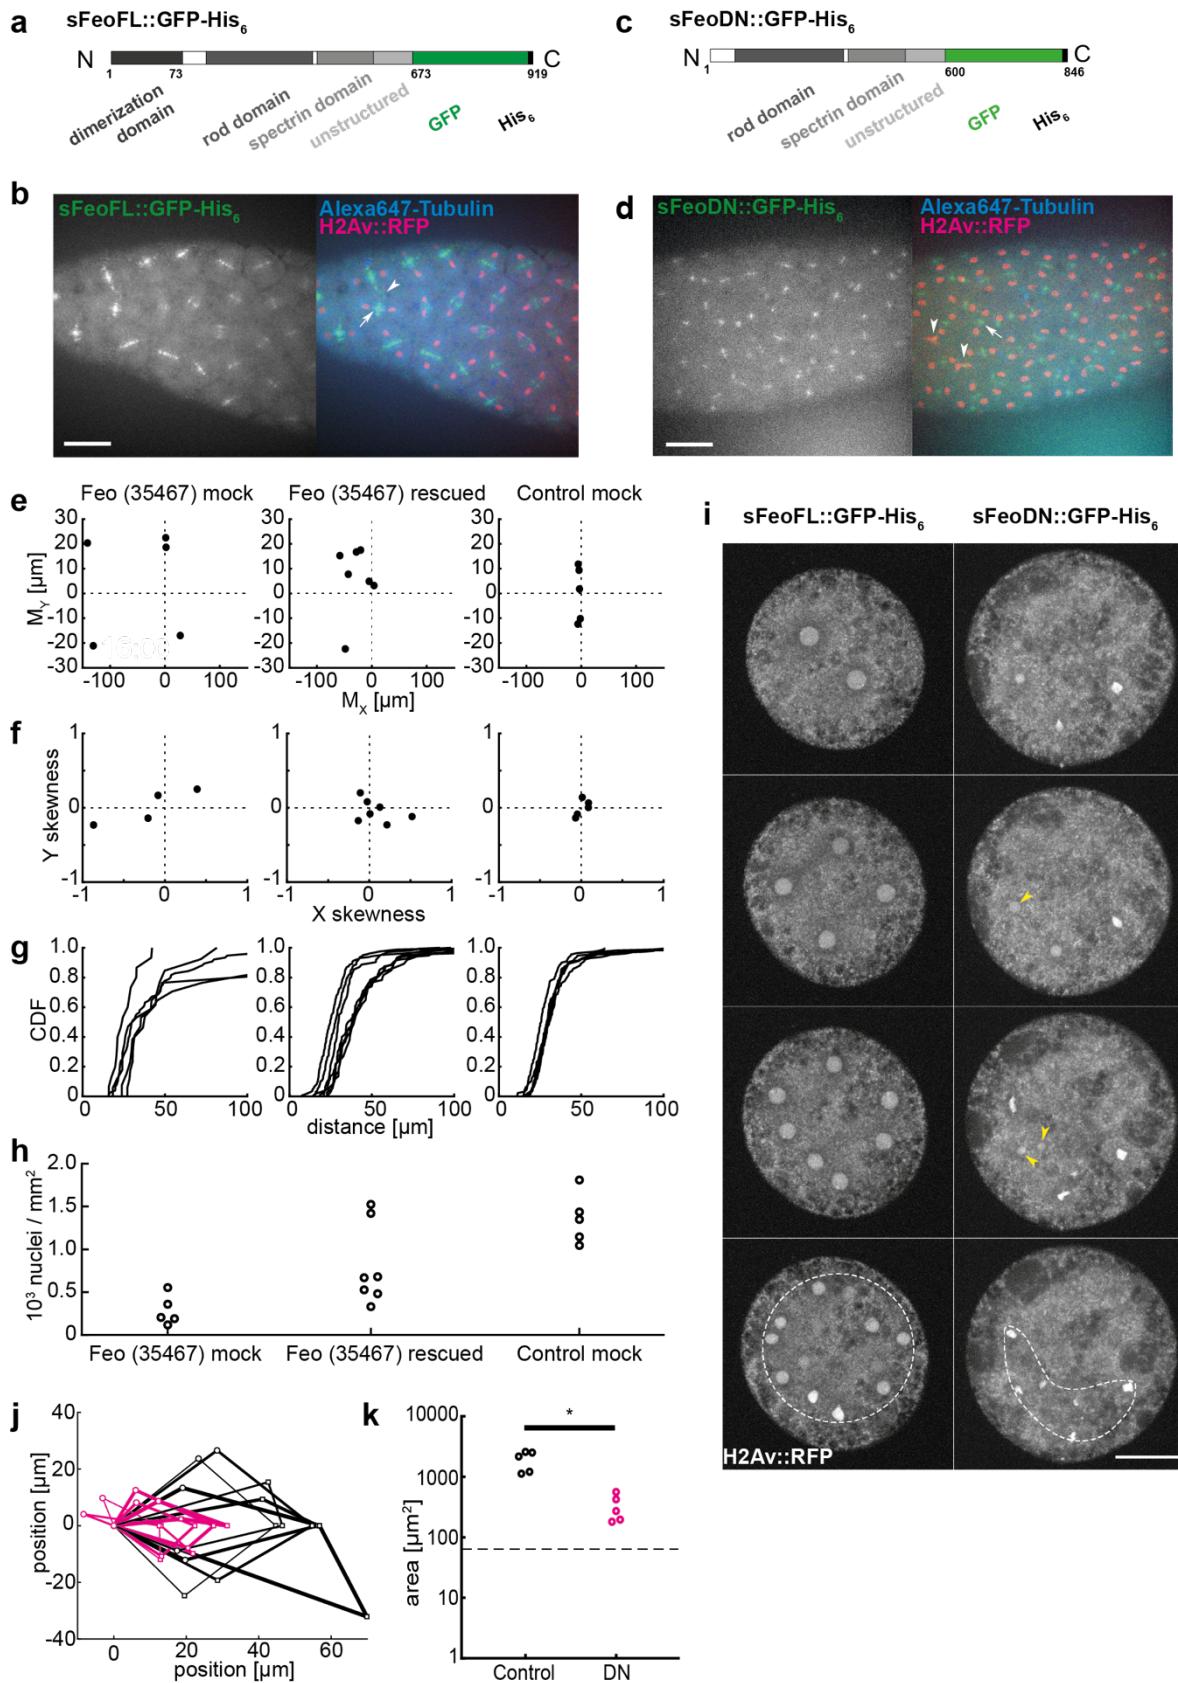

860

861 **Figure 5: Purified Feo protein rescues nuclear separation in Feo RNAi embryos, and a**  
 862 **dominant-negative monomer of Feo abolishes nuclear separation.**



863 **a)** Scheme of the synthesized full-length Feo protein fusion construct containing a C-terminal GFP.  
864 The domains were determined based on sequence similarity from reported domains of the human  
865 construct. The N-terminal end induces dimerization, and the spectrin domain binds to microtubule  
866 lattice. **b)** Fluorescence image of the GFP-tagged full-length Feo protein in a blastoderm embryo  
867 after protein injection at an earlier stage. The GFP signal alone (left) is shown merged with  
868 H2Av::RFP in magenta and Alexa647-Tubulin in blue (right). This Feo construct localizes  
869 correctly at the spindle midzone (arrow) and between daughter nuclei (arrowhead) as observed in  
870 the transgenic overexpression fly line shown in Fig. 1. Scale bar, 30  $\mu\text{m}$ . **c)** Scheme of a truncated  
871 Feo construct lacking the first 73 amino acids of the dimerization domain, fused to a C-terminal  
872 GFP. This monomeric protein is a dominant negative (DN) of full length Feo. **d)** Fluorescence  
873 image of the GFP-tagged dominant-negative Feo protein in a blastoderm embryo after protein  
874 injection at an earlier stage. The GFP signal alone (left) is shown merged with H2Av::RFP in  
875 magenta (right). Again, localization at the spindle midzone is observed (arrow). Nuclear separation  
876 defects become evident when neighboring nuclei touch or fuse after division (arrowheads). Scale  
877 bar, 30  $\mu\text{m}$ . **e)** Plot of the 2-dimensional centroid vector ( $M_x, M_y$ ) of all cortical nuclei relative to  
878 the embryo center for Feo RNAi embryos either mock injected (left;  $N = 5$ ) or injected with  
879 sFeoFL::GFP-His6 protein (middle;  $N = 7$ ), compared to mock injected control (mCherry) RNAi  
880 embryos ( $N = 5$ ). The  $x$ -axis designates the anterior-posterior axis and the  $y$ -axis is the dorso-ventral  
881 axis of the embryo. Deviations from zero mark an acentric delivery of nuclei to the cortex. Along  
882 the anterior-posterior axis the injection of Feo full-length protein in Feo RNAi embryos partially  
883 rescues centering (middle) while mock-injected Feo RNAi embryos have anatomically eccentric  
884 nuclei (left), whereas mock-injected control (mCherry) RNAi embryos exhibit strong centering. **f)**  
885 Skewness plot of the positional distribution of all nuclei along the anterior-posterior ( $x$ ) and  
886 dorsoventral ( $y$ ) axis for the same conditions as in e). The asymmetric distribution in mock-injected  
887 Feo RNAi embryos (left) is partially rescued by Feo protein injection (middle) while mock-injected  
888 control embryos show little asymmetry. **g)** Cumulative distribution plot of the first-order neighbor  
889 distance between nuclei, for the same conditions as in e) and f). The irregular internuclear distances  
890 in mock-injected Feo RNAi embryos (left) are rescued to a considerable extent after full-length  
891 protein injection (middle) while mock-injected control (mCherry) RNAi embryos exhibit uniform  
892 inter-nuclear distances (right). **h)** The low nuclear density arriving at the cortex in mock-injected  
893 Feo RNAi embryos is partially rescued when full-length Feo protein is injected in preblastoderm  
894 Feo RNAi embryos. **i)** Addition of full-length Feo::GFP protein to embryo explants expressing  
895 H2Av::RFP supports normal nuclear division and regular distribution within the explant space (left,  
896 white circle) while addition of dominant-negative Feo protein reduces nuclear separation  
897 (arrowheads) and abolishes nuclear distribution (dashed envelope). Scale bar, 30  $\mu\text{m}$ . **j)** Overlay of  
898 aligned quadrilaterals describing the nuclear separation after division in explants, as described in  
899 Fig. 4. Explants are generated from wildtype embryos and offer ample space for the first few  
900 divisions. Experiments involving addition of full-length Feo:GFP protein to the explant are in black  
901 ( $N = 5$ ), experiments involving addition of dominant-negative Feo::GFP protein are shown in  
902 magenta ( $N = 5$ ). **k)** The dominant-negative Feo protein significantly reduces nuclear separation,  
903 as measured by the area of quadrilaterals shown in j) when compared to the full-length protein  
904 construct (black).

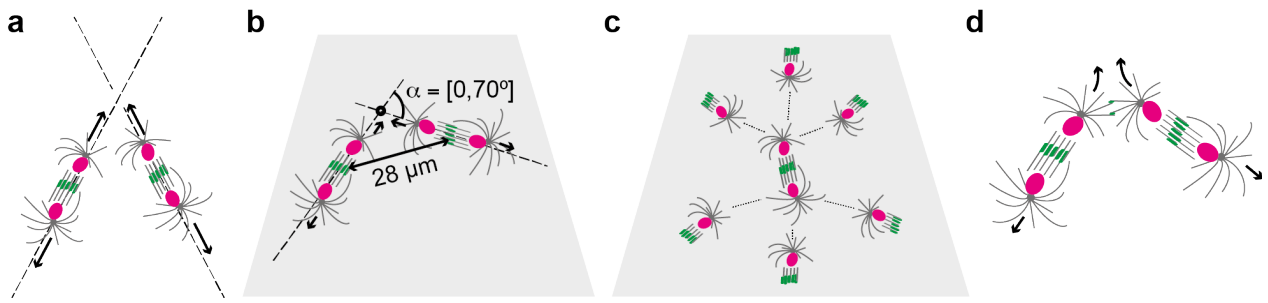

905

906 **Figure 6: Schematic showing collision trajectories of dividing nuclei in space and on 2-**  
907 **dimensional topologies.**

908 **a)** Two neighboring spindles with division axes that are oblique. Nuclei separate along the spindle  
909 axes, which do not have an intersecting point and do not cause nuclear collision. **b)** Two  
910 neighboring spindles with coplanar spindle axes. If these axes are not parallel, they will always  
911 form an intersection point. However, because of the short nuclear migration from the previous  
912 spindle center ( $\sim 14 \mu\text{m}$ ), the nuclear diameter ( $\sim 5 \mu\text{m}$ ) and the average inter-spindle distance ( $\sim 28$   
913  $\mu\text{m}$ ), two non-sibling nuclei will only collide if the relative angle alpha between spindle axes is  
914  $\leq 70^\circ$ . **c)** In a two-dimensional topology of spindles with optimal packing each spindle has six  
915 neighbors. In this configuration, and considering the geometric constraints shown in b), no  
916 configuration of center spindle axis orientation relative to its neighbors generate a non-sibling  
917 nuclear collision. **d)** Model of aster mediated repulsion between neighboring nuclei on a colliding  
918 trajectory after mitosis. Astral microtubule crosslinking by Feo and Klp3A generates a repulsive  
919 mechanical element that deviates the direction of separating nuclei from the spindle axis.

920 **Supplementary Figures**

921

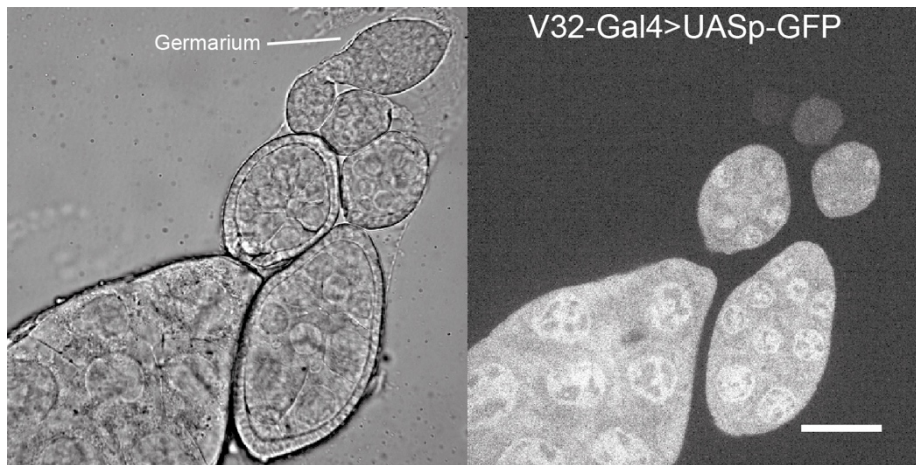

922

923 **Supplementary Figure 1: V32-Gal4 drives expression during late oogenesis.**

924 To evaluate the expression profile of the Gal4 driver, we made a construct expressing V32-Gal4  
925 driving UASp-GFP expression specifically in the female germline. The fluorescence intensity in  
926 the ovarioles indicates that the peak expression of GFP is achieved only at late stages of oogenesis.  
927 It illustrates the expression pattern of UASp constructs under the same Gal4 driver, including the  
928 various RNAi constructs described here, with maximum effect in late oogenesis. Scale bar, 10  $\mu$ m.

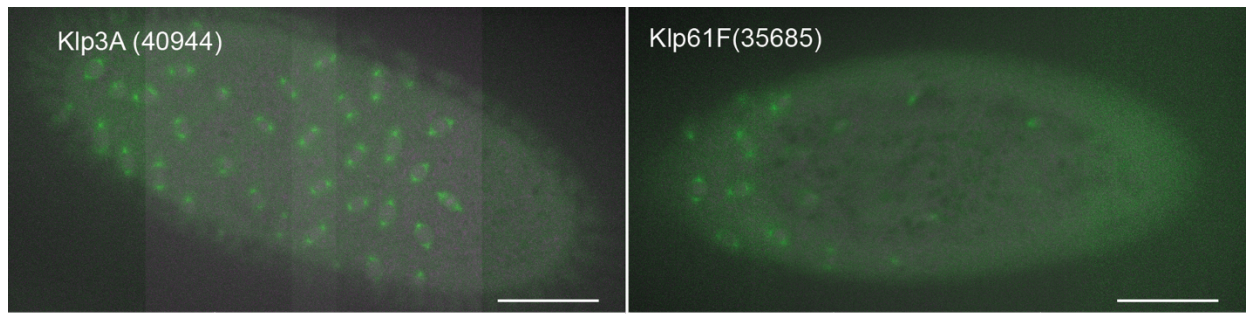

929

930 **Supplementary Figure 2: Partial knockdown of Klp3A (40944) or Klp61F (33685) by RNAi**  
931 **leads to defective nuclear delivery to the embryo cortex.**

932 Maximum intensity projections from three-dimensional time-lapse movies of embryos partially  
933 depleted of Klp3A or Klp61F, expressing Jupiter::GFP (green) marking microtubules and  
934 H2Av::RFP (magenta) marking chromatin. These two complementary RNAi lines provide  
935 additional support that the knock-down embryos show irregular nuclear distribution during the first  
936 interphase occurring at the cortex as compared to the regular nuclear distribution in control  
937 embryos (RNAi against mCherry; Fig. 3a). Scale bar, 50  $\mu$ m.

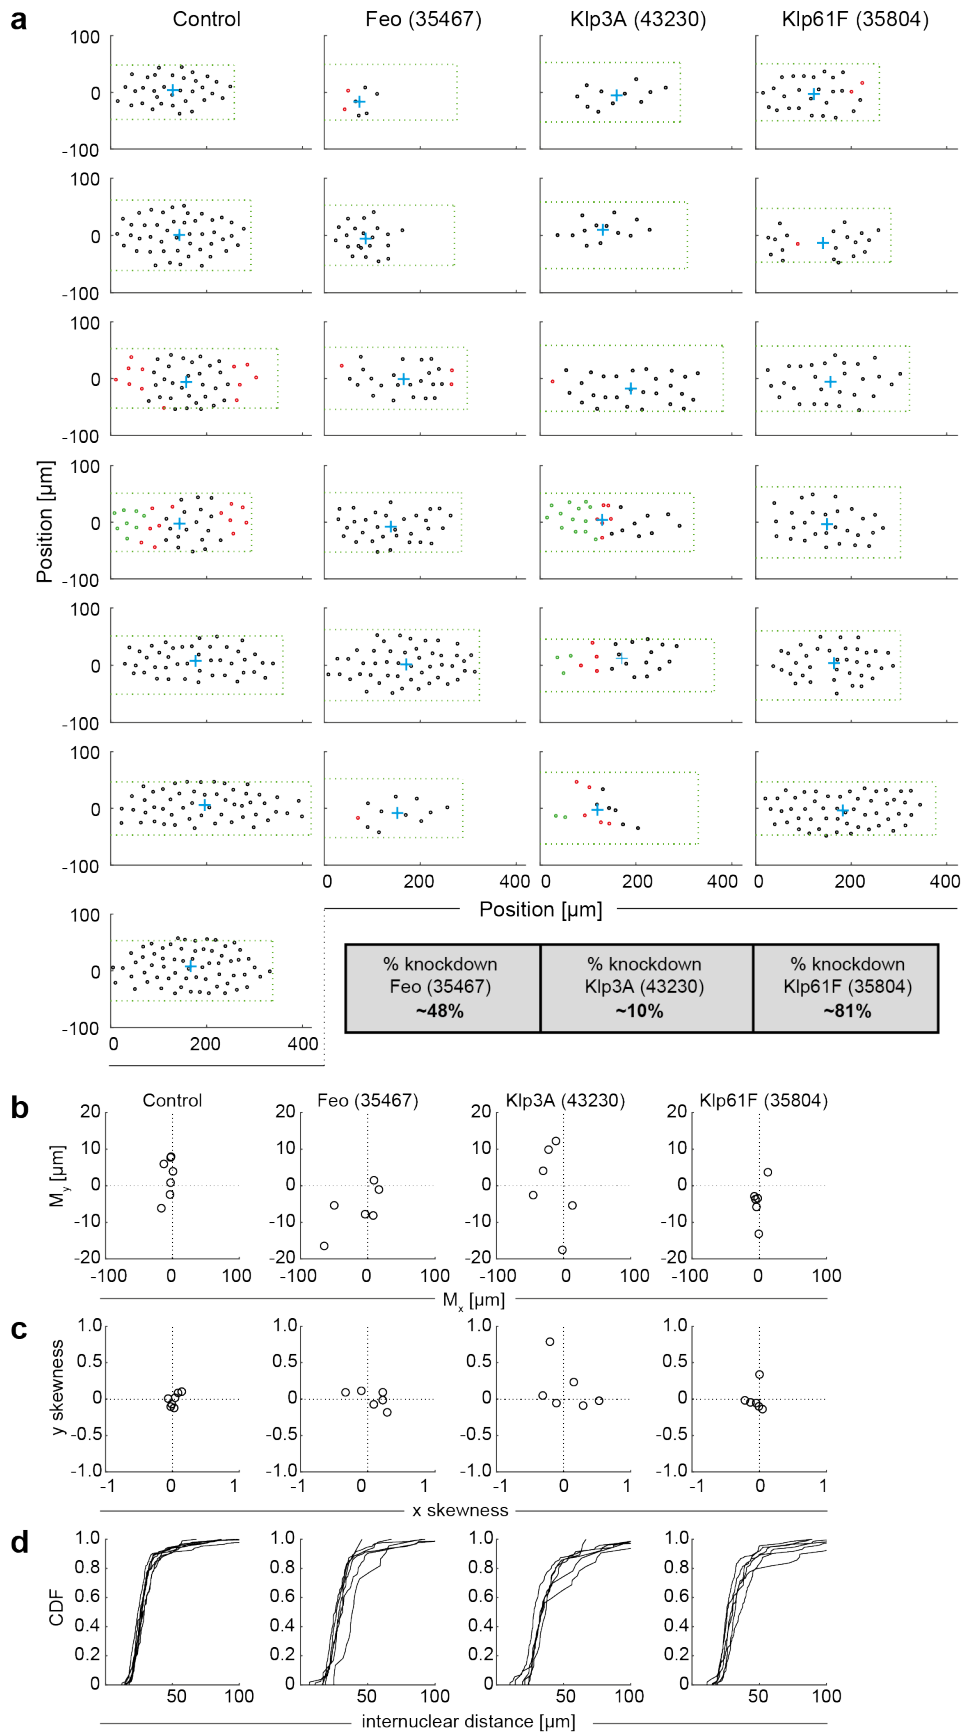

938

939 **Supplementary Figure 3: Positions of nuclei in each of the analyzed embryos and distribution**  
 940 **measurements highlight irregularity in the knockdown constructs.**

941 **a)** The position (circle) of every nucleus arriving at the embryo cortex after the last preblastoderm  
942 division, relative to the axial and lateral borders of the embryo, for each condition – Control  
943 (mCherry), Feo (35467), Klp3A (40320), Klp61F (35804). The green dashed rectangle represents  
944 the area of the embryo bounded by the length and width of the visible embryo in the confocal  
945 stacks, with the anterior end at the coordinate origin. The blue cross represents the location of the  
946 2-dimensional centroid determined from the position of all nuclei. The nuclei in interphase of the  
947 first division at the cortex are marked in black, the nuclei that have progressed to metaphase /  
948 anaphase are marked in magenta, and the nuclei in telophase / (next) interphase are marked in  
949 green. The percent knockdown of mRNA of the lines Feo (35467), Klp3A (40320) and Klp61F  
950 (35804) is 48%, 10% and 81%, respectively, as measured by quantitative PCR. **b)** Plot of the 2-  
951 dimensional centroid vector ( $M_x, M_y$ ) of all cortical nuclei relative to the embryo center. The  $x$ -axis  
952 designates the anterior-posterior axis and the  $y$ -axis is the dorsoventral axis of the embryo.  
953 Deviations from zero mark an acentric delivery of nuclei to the cortex. **c)** Skewness plot of the  
954 positional distribution of all nuclei along the anterior-posterior ( $x$ ) and dorsoventral ( $y$ ) axis. Feo  
955 RNAi and Klp3A RNAi embryos show asymmetric nuclear distribution while nuclei in Klp61F  
956 RNAi embryos are distributed symmetrically. **d)** Cumulative distribution plot of the first-order  
957 neighbor distance between nuclei. All RNAi lines show higher variability in internuclear distance  
958 as compared to the control.

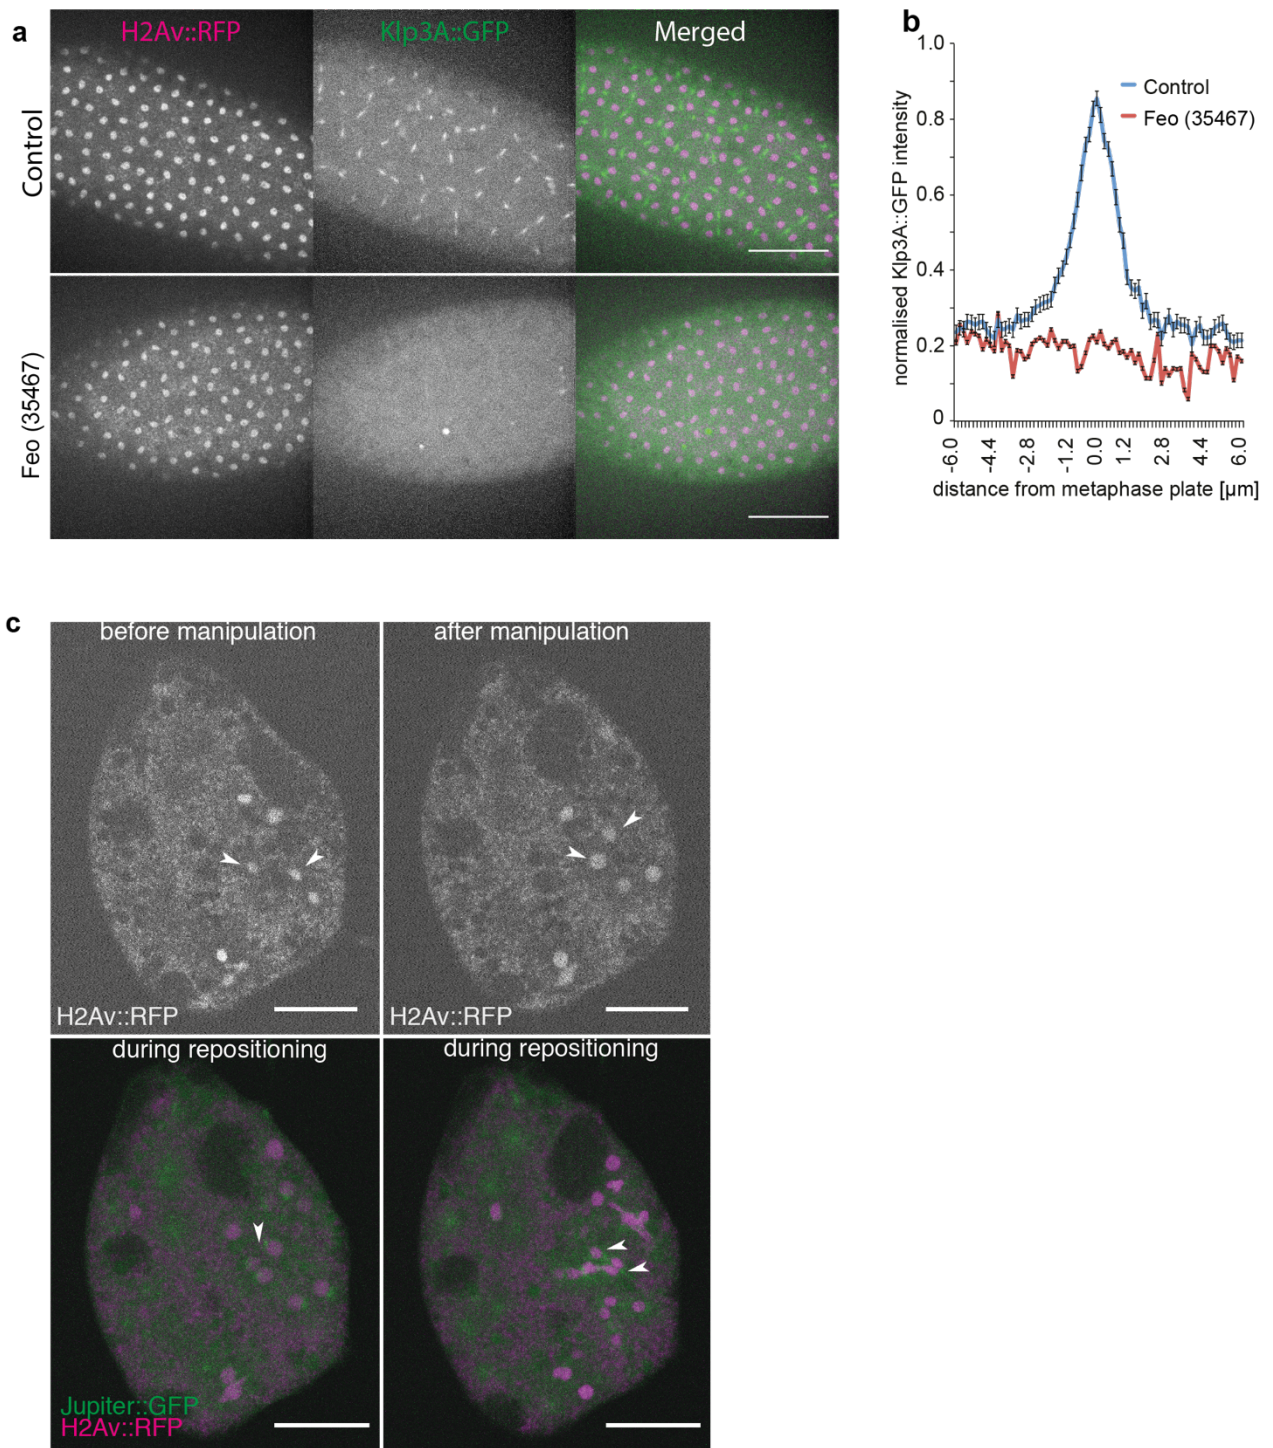

959

960 **Supplementary Figure 4: Partial depletion of Feo fails to recruit Klp3A to the spindle**  
961 **midzone and does not maintain nuclear separation after manipulation.**

962 **a)** Snapshots from a time-lapse of embryos expressing H2Av::RFP (magenta, left panel) and  
963 Klp3A::GFP (green, middle panel) during anaphase B or telophase. Feo knockdown embryos fail  
964 to recruit Klp3A at the spindle midzone when compared to the control embryos expressing no Feo  
965 RNAi. **b)** Quantification of Klp3A::GFP intensity measured at the spindle midzone along the  
966 spindle axis in control and Feo (35467) embryos. Scale bar, 50  $\mu\text{m}$ . **c)** Physical manipulation of  
967 nuclear position in an explant made from an embryo depleted of Feo and expressing Jupiter::GFP

968 (green) marking microtubules and H2Av::RFP (magenta) marking chromatin. After manipulation,  
969 the nuclei fail to elicit an efficient repositioning response as observed in the control. Instead, sister  
970 and non-sister nuclei fail to separate sufficiently, and nuclei come into contact or form clusters.  
971 Scale bar, 30  $\mu$ m.



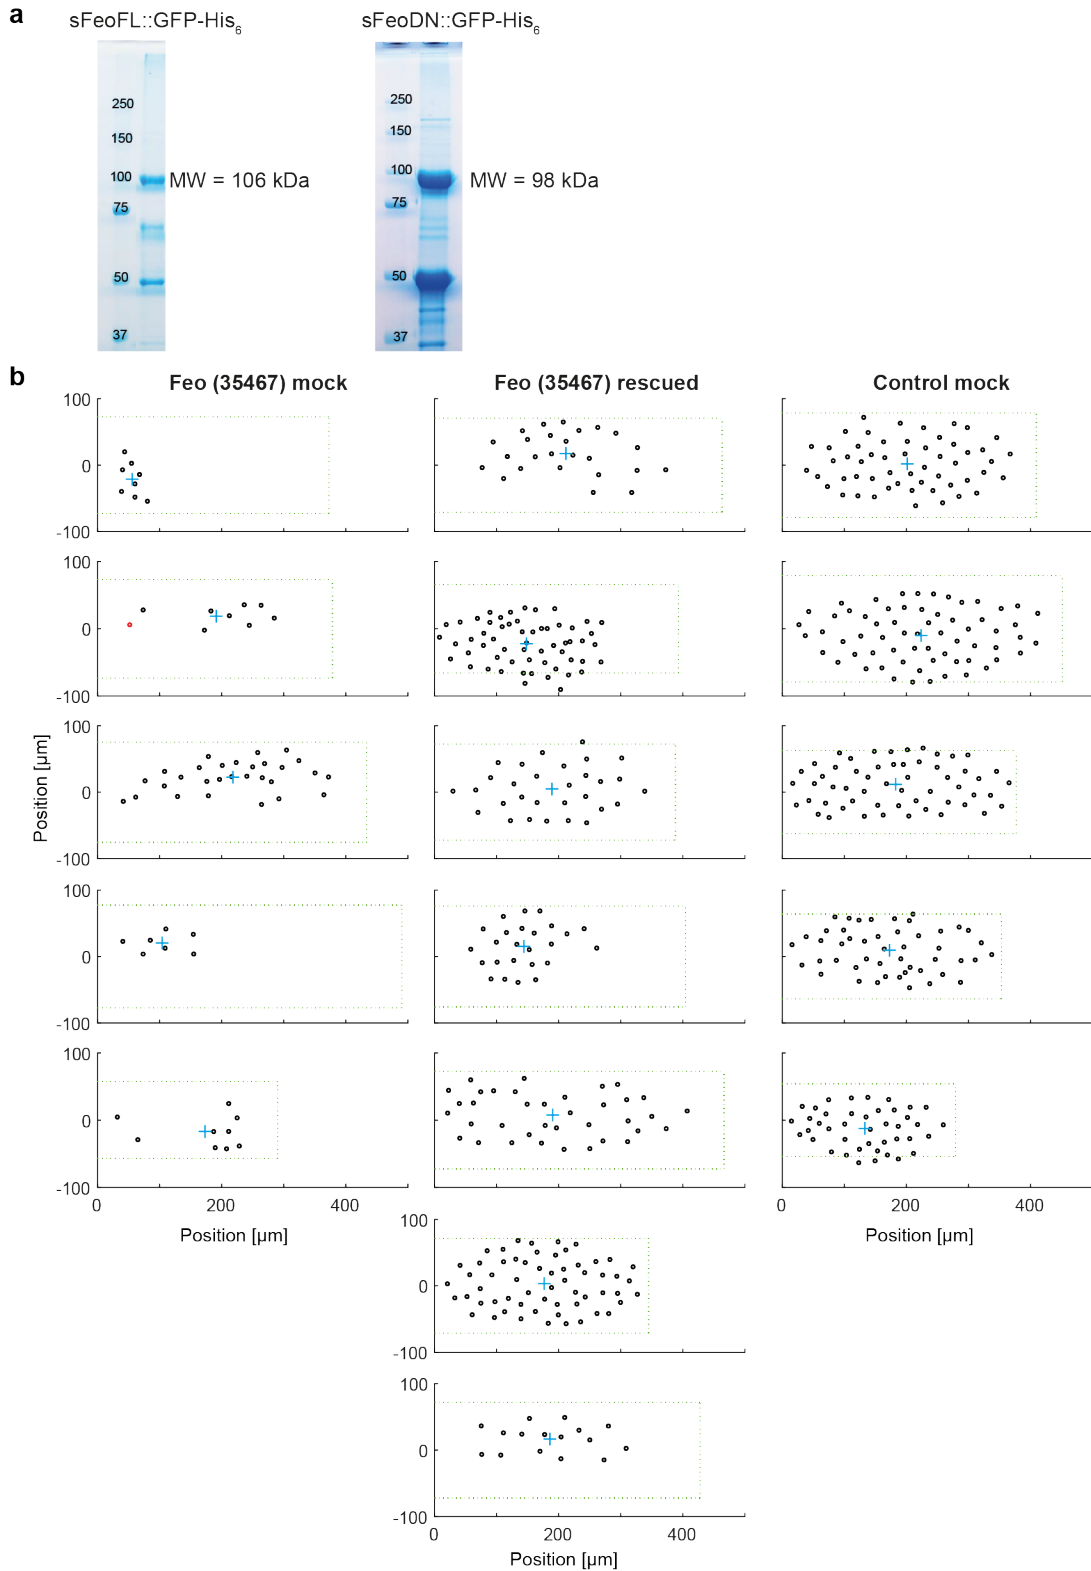

972

973 **Supplementary Figure 5: Full-length Feo::GFP protein partially rescues nuclear delivery to**  
974 **the cortex of Feo RNAi embryos.**

975 **a)** Coomassie-stained SDS gel of purified full-length Feo::GFP with an expected molecular weight  
976 of 106 kDa (left) and a N-terminally truncated Feo::GFP construct missing the dimerization  
977 domain, with expected molecular mass of 98 kDa (right). The lower bands are contaminants that

978 were not separated by gel filtration and are of bacterial origin as determined by mass spectrometry.  
979 **b)** The position (circle) of every nucleus arriving at the embryo cortex after the last preblastoderm  
980 division, relative to the axial and lateral borders of the embryo, for each condition: Feo (35467)  
981 mock-injected (buffer), Feo (35467) rescued by protein injection, Control (mCherry) mock-  
982 injected. The green dashed rectangle represents the area of the embryo bounded by the length and  
983 width of the visible embryo in the confocal stacks, with the anterior end at the coordinate origin.  
984 The cyan cross represents the location of the 2-dimensional centroid defined from the position of  
985 all nuclei. The nuclei in interphase of the first division at the cortex are marked in black, nuclei that  
986 have progressed to metaphase / anaphase are marked in magenta.
